# Supplementary material for: Synthesis and physical properties of zethrene derivatives bearing donor/acceptor substituents at 7,14-positions
Source: Royal Society of Chemistry journal article supplement (doi:10.1039/c3ob41674g), 2013-01-01
Supplement: c3ob41674g.pdf [file c3ob41674g.pdf]

## Supplementary Information

### Synthesis and physical properties of zethrene derivatives bearing donor/acceptor substituents at 7,14-positions

Daijiro Hibi,<sup>a</sup> Kenichi Kitabayashi,<sup>a</sup> Akihiro Shimizu,<sup>b</sup> Rui Umeda,<sup>c</sup> Yoshito Tobe\*

<sup>a</sup>*Division of Frontier Materials Science, Graduate School of Engineering Science, Osaka University, 1-3 Machikaneyama, Toyonaka 560-8531, Japan  
Tel.: +81-6-6850-6225; fax: +81-6-6850-6229*

<sup>b</sup>*Present address: Department of Synthetic Chemistry and Biological Chemistry, Kyoto University, Nishikyo-ku, Kyoto 615-8510, Japan.*

<sup>c</sup>*Present address: Department of Chemistry, Kansai University, Suita, Osaka 564-8680, Japan.*

|                                                                                |            |
|--------------------------------------------------------------------------------|------------|
| <b>1. General</b>                                                              | <b>S2</b>  |
| <b>2. Synthesis</b>                                                            | <b>S3</b>  |
| <b>3. Reaction of diiodozethrene 4b with IBr</b>                               | <b>S8</b>  |
| <b>4. UV-vis spectra of 2d in various solvents</b>                             | <b>S9</b>  |
| <b>5. Fluorescence spectra of 2a and 2b</b>                                    | <b>S9</b>  |
| <b>6. NMR spectra for 2a-f, 3b, 4b-c, 6 and 7</b>                              | <b>S10</b> |
| <b>7. Cartesian coordinates for optimized geometry of zethrene derivatives</b> | <b>S32</b> |
| <b>8. Reference</b>                                                            | <b>S40</b> |

## 1. General

$^1\text{H}$  and  $^{13}\text{C}$  NMR spectra were recorded in  $\text{CDCl}_3$  at 30 °C. The chemical shifts were referenced to the residual solvent protons in the  $^1\text{H}$  NMR (7.26 ppm) and in the  $^{13}\text{C}$  NMR (77.0 ppm). Mass spectral analyses were performed with EI or FAB mode. IR spectra were recorded as a KBr disk. Melting points were measured with a hot-stage apparatus equipped with a thermometer. Column chromatography and TLC were performed with silica gel (70-230 mesh) and pre-coated silica gel plates, respectively. Preparative recycling GPC separation was undertaken using two 600 mm  $\times$  20 mm GPC columns with  $\text{CHCl}_3$  as the eluent. All reagents were obtained from commercial suppliers and used as received. Solvents were dried (drying agent in parentheses) and distilled prior to use:  $\text{Et}_3\text{N}$  (KOH), benzene ( $\text{CaH}_2$ ), pyridine (KOH).

UV-vis spectra and fluorescence spectra were measured in spectrograde dichloromethane. Electrochemical measurements were performed in degassed  $\text{CH}_2\text{Cl}_2$  including  $n\text{-Bu}_4\text{NClO}_4$  as supporting electrolyte. Glassy carbon was used as the working electrode. The counter electrode was platinum wire, and reference electrode was  $\text{Ag}/\text{Ag}^+$ . The potential was corrected against ferrocene (Fc)/ferrocenium ( $\text{Fc}^+$ ) redox couple. Cyclic voltammetry (CV) was performed at a scan rate of 100 mV/s.

A single crystal of **2b** suitable for X-ray diffraction study was subjected to data collection which was conducted with a Rigaku IP detector with graphite monochromated  $\text{MoK}\alpha$  radiation. The positional and thermal parameters of non-hydrogen atoms were refined anisotropically on  $F_2$  by the full-matrix least-squares method using SHELXL-97.<sup>1</sup> Hydrogen atoms were placed at calculated positions and refined "riding" on their corresponding carbon atoms. In the subsequent refinement, the function  $\sum w(F_o^2 - F_c^2)^2$  was minimized, where  $|F_o|$  and  $|F_c|$  are the observed and calculated structure factor amplitudes, respectively. The agreement indices are defined as  $R1 = \sum (||F_o| - |F_c||) / \sum |F_o|$  and  $wR2 = [\sum w (F_o^2 - F_c^2)^2 / \sum (w F_o^2)^2]^{1/2}$ .

The DFT calculations were performed with a Gaussian 09 program package.<sup>2</sup> The geometries of the molecules were optimized by using the B3LYP method with the 6-31G(d) basis set. The nature of the stationary points was assessed by means of vibrational frequency analysis.

## 2. Synthesis

### 3,6-Di-*tert*-butyl-1,8-diiodonaphthalene (**6**)

H<sub>2</sub>SO<sub>4</sub> (18 M, 4.1 mL) was added to a solution of 1,8-diamino-3,6-di-*tert*-butylnaphthalene (**5**)<sup>3</sup> (3.49 g, 12.8 mmol) in EtOH (30 mL) which was cooled to -20 °C. NaNO<sub>2</sub> (2.48 g, 38.7 mmol) dissolved in H<sub>2</sub>O (19 mL) was added dropwise at -15 °C to -20 °C followed by the addition of KI (12.8 g, 77.4 mmol) dissolved in H<sub>2</sub>O (24 mL). The mixture was kept at -5 °C to 0 °C for 2 h and then heated at 60 °C for 30 min. After cooling to room temperature, the mixture was neutralized with aqueous NaOH solution and extracted with CHCl<sub>3</sub>. The organic layer was washed with saturated aqueous Na<sub>2</sub>S<sub>2</sub>O<sub>3</sub> solution and dried over MgSO<sub>4</sub>. The solvent was removed under reduced pressure. The residue was purified by silica-gel column chromatography (hexanes) followed by preparative GPC. The crude product was recrystallized from a mixture of hexanes : EtOH = 1 : 1 to afford 1.65 g (26%) of **6** as a yellow solid. mp 108–110 °C; <sup>1</sup>H NMR (400 MHz, CDCl<sub>3</sub>, 30 °C) δ 8.38 (d, *J* = 1.6 Hz, 2H), 7.72 (d, *J* = 1.6 Hz, 2H), 1.38 (s, 18H); <sup>13</sup>C NMR (100 MHz, CDCl<sub>3</sub>, 30 °C) δ 149.6, 142.3, 135.3, 128.7, 126.3, 95.7, 34.3, 31.0; IR (KBr) 3064, 2963, 2905, 2867, 1612, 1526, 1479, 1365, 1257, 1165, 964, 879, 627 cm<sup>-1</sup>; MS (EI) *m/z* 491.9 (M<sup>+</sup>); Anal. Calcd for C<sub>18</sub>H<sub>22</sub>I<sub>2</sub>: C, 43.93; H, 4.51. Found: C, 44.19; H, 4.59.

### 3,6-Di-*tert*-butyl-1,8-bis[(trimethylsilyl)ethynyl]naphthalene (**7**)

A mixture of **6** (501 mg, 1.02 mmol), (trimethylsilyl)acetylene (580 μL, 4.1 mmol), Pd(PPh<sub>3</sub>)<sub>2</sub>Cl<sub>2</sub> (220 mg, 0.31 mmol) and CuI (69 mg, 0.36 mmol) in Et<sub>3</sub>N was heated at 100 °C under an argon atmosphere for 1 h. After the mixture was cooled to room temperature, the solvent was removed under reduced pressure. The residue was purified by silica-gel column chromatography (hexanes : AcOEt = 100 : 1) to afford 329 mg (75%) of **7** as a colorless solid. mp 165–166 °C; <sup>1</sup>H NMR (400 MHz, CDCl<sub>3</sub>, 30 °C) δ 7.79 (d, *J* = 2.0 Hz, 2H), 7.67 (d, *J* = 2.0 Hz, 2H), 1.39 (s, 18H), 0.31 (s, 18H); <sup>13</sup>C NMR (100 MHz, CDCl<sub>3</sub>, 30 °C) δ 147.8, 134.9, 134.0, 127.0, 125.3, 119.8, 106.0, 101.5, 34.5, 31.1, 0.4; IR (KBr) 3058, 2966, 2906, 2872, 2141, 1609, 1375, 1247, 889, 856 cm<sup>-1</sup>; HRMS (EI) *m/z* Calcd for C<sub>28</sub>H<sub>40</sub>Si<sub>2</sub> [M<sup>+</sup>] 432.2669, Found: 432.2655.

### Tetra-*tert*-butyl-1,6-dinaphthotetradehydro[10]annulene (**3b**)

An aqueous solution of NaOH (4.0 M, 270 μL, 1.1 μmol) was added to a solution of **6** (150 mg, 305 μmol), **7** (120 mg, 277 μmol), Pd(PPh<sub>3</sub>)<sub>4</sub> (112 mg, 97.1 μmol), CuI (26 mg, 140 μmol) and DBU (0.29 mL, 1.94 mmol) in benzene (16 mL) and pyridine (4 mL), which had been degassed by bubbling argon for 20 min. After the mixture was stirred under an argon atmosphere at room temperature for 16 h, the solvents were removed under reduced pressure. The residue was

subjected to silica-gel column chromatography (hexanes :  $\text{CHCl}_3 = 20 : 1$ ). The solid product was washed with hexanes to give 37.5 mg (26%) of **3b** as a yellow solid. mp 153 °C dec.;  $^1\text{H}$  NMR (400 MHz,  $\text{CDCl}_3$ , 30 °C)  $\delta$  7.76 (d,  $J = 2.0$  Hz, 4H), 7.71 (d,  $J = 2.0$  Hz, 4H), 1.44 (s, 36H);  $^{13}\text{C}$  NMR (100 MHz,  $\text{CDCl}_3$ , 30 °C)  $\delta$  148.2, 134.5, 129.6, 128.3, 125.2, 120.6, 95.4, 34.7, 31.1; IR (KBr) 3057, 2962, 2868, 1608, 1595, 1362, 885, 786, 644  $\text{cm}^{-1}$ ; HRMS (EI)  $m/z$  Calcd for  $\text{C}_{40}\text{H}_{44} [\text{M}^+]$  524.3423, Found: 524.3443.

#### **2,5,9,12-Tetra-tert-butyl-7,14-diiodozethrene (4b)**

A solution of **3b** (43.5 mg, 82.9  $\mu\text{mol}$ ) and iodine (88.4 mg, 348  $\mu\text{mol}$ ) in  $\text{CHCl}_3$  was stirred at room temperature under an argon atmosphere for 6 h. During the reaction, the mixture was protected from room light by covering the flask with an aluminum foil. The mixture was diluted with  $\text{CHCl}_3$  and washed with saturated aqueous  $\text{Na}_2\text{S}_2\text{O}_3$  solution. The aqueous layer was extracted with  $\text{CHCl}_3$  twice. The combined organic layer was dried over  $\text{MgSO}_4$  and the solvent was removed under reduced pressure. Silica-gel column chromatography (hexanes) gave 77.0 mg (68%) of **4b** as a red solid. mp 209–210 °C;  $^1\text{H}$  NMR (400 MHz,  $\text{CDCl}_3$ , 30 °C)  $\delta$  8.52 (d,  $J = 1.2$  Hz, 2H), 8.20 (d,  $J = 1.2$  Hz, 2H), 7.81 (d,  $J = 1.2$  Hz, 2H), 7.71 (d,  $J = 1.2$  Hz, 2H), 1.49 (s, 18H), 1.48 (s, 18H);  $^{13}\text{C}$  NMR (100 MHz,  $\text{CDCl}_3$ , 30 °C)  $\delta$  149.6, 147.9, 141.4, 132.7, 132.6, 132.2, 131.7, 128.8, 125.3, 124.0, 123.9, 99.9, 35.1, 31.3, 31.2; IR (KBr) 3057, 2960, 2904, 2867, 1476, 1362, 1245, 1211, 948, 891, 877, 648  $\text{cm}^{-1}$ ; MS (FAB)  $m/z$  778.1 ( $\text{M}^+$ ); Anal. Calcd for  $\text{C}_{18}\text{H}_{22}\text{I}_2$ : C, 61.71, H, 5.70, Found: C, 61.60; H, 5.81.

#### **7,14-Dibromo-2,5,9,12-tetra-tert-butylzethrene (4c)**

A 40 mL solution of  $\text{IBr}$  in  $\text{CHCl}_3$  (11 mM, 40 mL, 440  $\mu\text{mol}$ ) was added to **3b** (95.5 mg, 182  $\mu\text{mol}$ ) under argon and the mixture was stirred at room temperature for 4 h. After the mixture was diluted by  $\text{CHCl}_3$ , it was washed with saturated aqueous  $\text{Na}_2\text{S}_2\text{O}_3$  solution. The aqueous layer was extracted with  $\text{CHCl}_3$  twice. The combined organic layer was dried over  $\text{MgSO}_4$  and the solvent was removed under reduced pressure. The residue was subjected to silica-gel column chromatography (hexanes) to give 74.5 mg (60%) of **4c** as a red solid. mp 158–160 °C;  $^1\text{H}$  NMR (400 MHz,  $\text{CDCl}_3$ , 30 °C)  $\delta$  8.63 (d,  $J = 1.6$  Hz, 2H), 8.23 (d,  $J = 1.6$  Hz, 2H), 7.79 (d,  $J = 1.6$  Hz, 2H), 7.72 (d,  $J = 1.6$  Hz, 2H), 1.48 (s, 18H), 1.47 (s, 18H);  $^{13}\text{C}$  NMR (100 MHz,  $\text{CDCl}_3$ , 30 °C)  $\delta$  149.2, 148.2, 135.3, 132.6, 130.9, 129.5, 128.8, 125.3, 125.2, 124.2, 123.7, 119.8, 35.1, 35.0, 31.3, 31.1; IR (KBr) 2961, 2905, 2869, 1463, 1363, 953, 880, 650, 417  $\text{cm}^{-1}$ ; HRMS (EI)  $m/z$  Calcd for  $\text{C}_{40}\text{H}_{44}\text{Br}_2 [\text{M}^+]$  684.1794, Found: 684.1796.

#### **2,5,9,12-Tetra-tert-butyl-7,14-bis(phenylethynyl)zethrene (2a)**

To a solution of **4b** (15.4 mg, 19.7  $\mu\text{mol}$ ),  $\text{Pd}(\text{PPh}_3)_4$  (9.5 mg, 8.2  $\mu\text{mol}$ ) and  $\text{CuI}$  (2.7 mg, 14.2

μmol) in degassed Et<sub>3</sub>N (6 mL) was added phenylacetylene (30 μL, 28mg, 260 μmol) under an argon atmosphere. After stirring at room temperature for 6 h, the solvent was removed under reduced pressure. The residue was purified by silica-gel column chromatography (hexanes : CHCl<sub>3</sub> = 10 : 1) to afford 12.6 mg (89%) of **2a** as a purple solid. mp 249–250 °C; <sup>1</sup>H NMR (400 MHz, CDCl<sub>3</sub>, 30 °C) δ 9.09 (d, *J* = 1.6 Hz, 2H), 8.35 (d, *J* = 1.6 Hz, 2H), 7.81 (d, *J* = 1.6 Hz, 2H), 7.71 (d, *J* = 1.6 Hz, 2H), 7.59–7.57 (m, 4H), 7.37–7.35 (m, 6H), 1.50 (s, 18H), 1.39 (s, 18H); <sup>13</sup>C NMR (100 MHz, CDCl<sub>3</sub>, 30 °C) δ 149.2, 148.9, 137.9, 132.9, 131.8, 131.6, 130.0, 128.4, 128.1, 126.1, 124.8, 124.6, 123.7, 123.5, 123.0, 115.9, 93.9, 90.4, 35.02, 35.00, 31.5, 31.4; IR (KBr) 3053, 2961, 2905, 2868, 2179, 1594, 1479, 1464, 1362, 1246, 1212, 883, 754 cm<sup>-1</sup>; HRMS (FAB) *m/z* Calcd for C<sub>56</sub>H<sub>54</sub> [M<sup>+</sup>]: 726.4226, Found: 726.4216.

#### **2,5,9,12-Tetra-*tert*-butyl-7,14-bis[[4-(*N,N*-dimethylamino)phenyl]ethynyl]zethrene (2b)**

A solution of **4b** (43.7 mg, 56.1 μmol), [4-(*N,N*-dimethylamino)phenyl]acetylene<sup>4</sup> (97.8 mg, 673 μmol), Pd(PPh<sub>3</sub>)<sub>4</sub> (20.7 mg, 17.9 μmol) and CuI (6.7 mg, 35.1 μmol) in degassed Et<sub>3</sub>N (6 mL) was stirred under an argon atmosphere at room temperature for 6 h. The solvent was removed under reduced pressure and the product was purified by silica-gel column chromatography (hexanes : CHCl<sub>3</sub> = 1 : 1). The crude product was subjected to preparative GPC separation for further purification to afford 32.6 mg (71%) of **2b** as a blue solid. mp 195–196 °C; <sup>1</sup>H NMR (400 MHz, CDCl<sub>3</sub>, 30 °C) δ 9.17 (d, *J* = 1.6 Hz, 2H), 8.37 (d, *J* = 1.6 Hz, 2H), 7.78 (d, *J* = 1.6 Hz, 2H), 7.67 (d, *J* = 1.6 Hz, 2H), 7.48 (d, *J* = 8.8 Hz, 4H), 6.69 (d, *J* = 8.8 Hz, 4H), 3.02 (s, 12H), 1.50 (s, 18H), 1.43 (s, 18H); <sup>13</sup>C NMR (100 MHz, CDCl<sub>3</sub>, 30 °C) δ 150.0, 149.0, 148.7, 136.7, 133.1, 132.9, 132.0, 130.4, 125.8, 125.0, 123.9, 123.0, 122.8, 116.3, 111.9, 110.8, 95.5, 88.5, 40.2, 35.04, 34.99, 31.6, 31.5; IR (KBr) 3093, 3043, 2959, 2901, 2865, 2804, 2160, 1604, 1529, 1479, 1443, 1358, 1189, 1164, 883, 814 cm<sup>-1</sup>; HRMS (FAB) *m/z* Calcd for C<sub>60</sub>H<sub>64</sub>N<sub>2</sub> [M<sup>+</sup>]: 812.5070, Found: 812.5097.

#### **2,5,9,12-Tetra-*tert*-butyl-7,14-bis[(dinitrophenyl)ethynyl]zethrene (2c)**

A solution of **4b** (40.3 mg, 51.7 μmol), (4-nitrophenyl)acetylene<sup>5</sup> (39.4mg, 268 μmol), Pd(PPh<sub>3</sub>)<sub>4</sub> (11.9 mg, 10.3 μmol) and CuI (3.2 mg, 17 μmol) in Et<sub>3</sub>N (13 mL) was stirred under an argon atmosphere at a room temperature for 2.5 h. After the solvent was removed under reduced pressure, the residue was subjected to silica-gel column chromatography (hexanes : CHCl<sub>3</sub> = 1 : 1) to afford 27.1 mg (64%) of **2c** as a blue solid. mp 255 °C dec.; <sup>1</sup>H NMR (400 MHz, CDCl<sub>3</sub>, 30 °C) δ 8.95 (d, *J* = 1.6 Hz, 2H), 8.28 (d, *J* = 1.6 Hz, 2H), 8.26 (d, *J* = 9.2 Hz, 4H), 7.88 (d, *J* = 1.6 Hz, 2H), 7.78 (d, *J* = 1.6 Hz, 2H), 7.69 (d, *J* = 9.2 Hz, 4H), 1.51 (s, 18H), 1.39 (s, 18H); <sup>13</sup>C NMR (100 MHz, CDCl<sub>3</sub>, 30 °C) δ 149.5, 149.2, 146.9, 139.2, 133.0, 132.3, 131.1, 130.4, 129.6, 126.5, 125.4, 124.6, 124.2, 123.8, 123.2, 115.3, 96.1, 91.6, 35.08, 35.05,

31.5, 31.4; IR (KBr) 2961, 2907, 2865, 2172, 1591, 1519, 1477, 1362, 1339, 1105, 883, 852, 748  $\text{cm}^{-1}$ ; HRMS (EI)  $m/z$  Calcd for  $\text{C}_{36}\text{H}_{52}\text{O}_4\text{N}_2$  [ $\text{M}^+$ ]: 816.3927, Found: 816.3908.

**7-Bromo-2,5,9,12-tetra-*tert*-butyl-14-[[4-(*N,N*-dimethylamino)phenyl]ethynyl]zethrene (2g)**

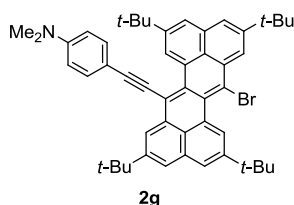

To a mixture of **4c** (101 mg, 148  $\mu\text{mol}$ ),  $\text{Pd}(\text{PPh}_3)_4$  (51.2 mg, 44.4  $\mu\text{mol}$ ) and  $\text{CuI}$  (9.9 mg, 52  $\mu\text{mol}$ ) was added a solution of [4-(*N,N*-dimethylamino)phenyl]acetylene (3.4 mM, 103  $\mu\text{mol}$ ) in degassed  $\text{Et}_3\text{N}$  (30 mL) under an argon atmosphere. After stirring at room temperature for 2 h, the solvent was removed under reduced pressure. The residue was subjected to silica-gel column chromatography (hexanes :  $\text{CHCl}_3$  = 1 : 1) to afford 27.7 mg of a reddish solid product containing **2g**. This product was subjected to next Sonogashira coupling without further purification. 25.2 mg (21%) of **2b** was also obtained and 35.4 mg (35 %) of the starting material **4c** was recovered.

**2,5,9,12-Tetra-*tert*-butyl-7-[[4-(*N,N*-dimethylamino)phenyl]ethynyl]-14-[(nitrophenyl)ethynyl]zethrene (2d)**

To a mixture of **2g** (45.0 mg, 60.1  $\mu\text{mol}$ ),  $\text{Pd}(\text{PPh}_3)_4$  (24.1 mg, 21.0  $\mu\text{mol}$ ) and  $\text{CuI}$  (4.6 mg, 24  $\mu\text{mol}$ ) was added a solution of (4-nitrophenyl)acetylene (6.84 mM, 171  $\mu\text{mol}$ ) in degassed  $\text{Et}_3\text{N}$  (25 mL) under an argon atmosphere. After stirring at room temperature for 2.5 h, the solvent was removed under reduced pressure. The residue was subjected to silica-gel column chromatography (hexanes :  $\text{CHCl}_3$  = 1 : 1) followed by preparative GPC to afford 39.0 mg (80%) of **2e** as a dark blue solid. mp 138–140  $^\circ\text{C}$ ;  $^1\text{H}$  NMR (400 MHz,  $\text{CDCl}_3$ , 30  $^\circ\text{C}$ )  $\delta$  9.19 (s, 1H), 8.93 (d,  $J$  = 1.6 Hz, 1H), 8.45 (d,  $J$  = 1.2 Hz, 1H), 8.24 (d,  $J$  = 8.8 Hz, 2H), 8.20 (s, 1H), 7.85 (d,  $J$  = 1.2 Hz, 1H), 7.80 (s, 1H), 7.74 (s, 1H), 7.71 (s, 1H), 7.67 (d,  $J$  = 8.8 Hz, 2H), 7.49 (d,  $J$  = 8.8 Hz, 2H), 6.70 (d,  $J$  = 8.8 Hz, 2H), 3.03 (s, 6H), 1.52 (s, 9H), 1.50 (s, 9H), 1.44 (s, 9H), 1.39 (s, 9H);  $^{13}\text{C}$  NMR (100 MHz,  $\text{CDCl}_3$ , 30  $^\circ\text{C}$ )  $\delta$  150.1, 149.4, 149.1, 149.0, 148.7, 146.7, 139.9, 136.1, 133.2, 133.1, 132.8, 132.2, 131.7, 131.4, 130.8, 130.2, 129.9, 126.3, 125.9, 125.2, 124.9, 124.7, 124.3, 123.9, 123.8, 123.6, 123.5, 122.1, 117.4, 114.2, 111.9, 110.3, 97.1, 96.4, 91.1, 88.1, 40.2, 35.09, 35.07, 35.02, 34.97, 31.52, 31.47, 31.44, 31.42; IR (KBr) 2961, 2362, 2168, 1606, 1591, 1520, 1338, 883, 853, 815  $\text{cm}^{-1}$ ; HRMS (EI)  $m/z$  Calcd for  $\text{C}_{58}\text{H}_{58}\text{N}_2\text{O}_2$  [ $\text{M}^+$ ] 814.4498, Found: 814.4528.

**2,5,9,12-Tetra-*tert*-butyl-7,14-bis[(trimethylsilyl)ethynyl]zethrene (2e)**

To a solution of **4b** (20.5 mg, 26.3  $\mu\text{mol}$ ),  $\text{Pd}(\text{PPh}_3)_4$  (7.6 mg, 6.6  $\mu\text{mol}$ ) and  $\text{CuI}$  (1.5 mg, 7.9  $\mu\text{mol}$ ) in degassed  $\text{Et}_3\text{N}$  (15 mL) was added (trimethylsilyl)acetylene (69  $\mu\text{L}$ , 48 mg, 260  $\mu\text{mol}$ ) under an argon atmosphere. After stirring at 60  $^\circ\text{C}$  for 6 h, the solvent was removed under reduced pressure. The residue was purified by silica-gel column chromatography (hexanes) to afford 9.8 mg (52%) of **2e** as a purple solid. mp 189  $^\circ\text{C}$ ;  $^1\text{H}$  NMR (400 MHz,  $\text{CDCl}_3$ , 30  $^\circ\text{C}$ )  $\delta$  9.05 (s, 2H), 8.23 (s, 2H), 7.79 (s, 2H), 7.67 (s, 2H), 1.49 (s, 18H), 1.48 (s, 18H), 0.33 (s, 18H);  $^{13}\text{C}$  NMR (100 MHz,  $\text{CDCl}_3$ , 30  $^\circ\text{C}$ )  $\delta$  149.0, 148.6, 138.0, 132.7, 131.6, 129.6, 126.6, 124.6, 124.5, 123.42, 123.35, 115.9, 105.8, 100.1, 35.3, 35.0, 31.6, 31.3, 0.5; IR (KBr) 2958, 2902, 2864, 2360, 2121, 1477, 1363, 1249, 842, 758, 647  $\text{cm}^{-1}$ ; HRMS (EI)  $m/z$  Calcd for  $\text{C}_{50}\text{H}_{62}\text{Si}_2$  [ $\text{M}^+$ ] 718.4390, Found: 718.4420.

#### **2,5,9,12-Tetra-tert-butyl-7,14-bis[(tri-iso-propylsilyl)ethynyl]zethrene (2f)**

To a solution of **4b** (20.1 mg, 25.7  $\mu\text{mol}$ ),  $\text{Pd}(\text{PPh}_3)_4$  (7.4 mg, 6.4  $\mu\text{mol}$ ) and  $\text{CuI}$  (1.5 mg, 7.7  $\mu\text{mol}$ ) in degassed  $\text{Et}_3\text{N}$  (15 mL) was added (tri-iso-propylsilyl)acetylene (120  $\mu\text{L}$ , 260  $\mu\text{mol}$ ) under an argon atmosphere. After stirring at 70  $^\circ\text{C}$  for 8 h, the solvent was removed under reduced pressure. The product was purified by silica-gel column chromatography (hexanes) to afford 9.1 mg (40%) of **2f** as a purple solid. mp 190  $^\circ\text{C}$  dec.;  $^1\text{H}$  NMR (400 MHz,  $\text{CDCl}_3$ , 30  $^\circ\text{C}$ )  $\delta$  8.84 (s, 2H), 8.24 (s, 2H), 7.79 (s, 2H), 7.66 (s, 2H), 1.47 (s, 18H), 1.44 (s, 18H), 1.24-1.12 (m, 42H);  $^{13}\text{C}$  NMR (100 MHz,  $\text{CDCl}_3$ , 30  $^\circ\text{C}$ )  $\delta$  149.1, 148.7, 139.1, 132.7, 132.0, 129.7, 126.6, 125.1, 124.7, 123.5, 123.2, 115.4, 107.3, 94.3, 35.1, 35.0, 31.6, 31.3, 19.0, 11.9; IR (KBr) 2960, 2865, 2114, 1464, 1363, 1245, 990, 883, 737, 646  $\text{cm}^{-1}$ ; HRMS (FAB)  $m/z$  Calcd for  $\text{C}_{62}\text{H}_{86}\text{Si}_2$  [ $\text{M}^+$ ] 886.6268, Found: 886.6276.

### 3. Reaction of diiodozethrene **4b** with IBr

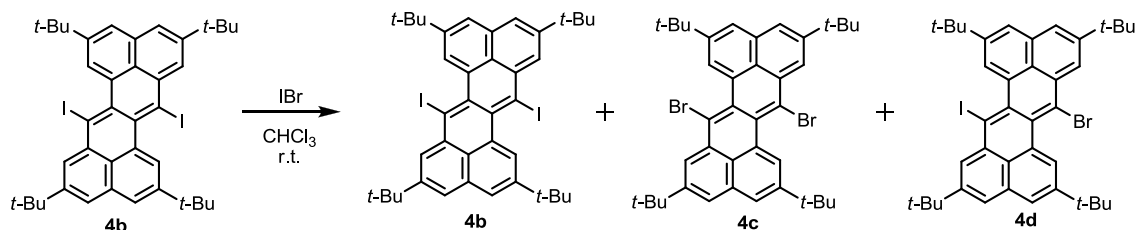

Respective amount of IBr (Table below) in CHCl<sub>3</sub> was added to **4b** under argon and the mixture was stirred at room temperature for 2 h. After the mixture was diluted by CHCl<sub>3</sub> it was washed with saturated aqueous Na<sub>2</sub>S<sub>2</sub>O<sub>3</sub> solution. The aqueous layer was extracted with CHCl<sub>3</sub> twice. The combined organic layer was dried over MgSO<sub>4</sub> and the solvent was removed under reduced pressure. <sup>1</sup>H NMR spectrum of this product exhibited signals assigned to **4b**, **4c** and **4d** from which the relative ratio was determined (Figure S1). Mass spectrum (LDI-TOF) also exhibited molecular ion peak at *m/z* 731.04 corresponding to C<sub>40</sub>H<sub>44</sub>BrI<sup>+</sup>.

| amount of <b>4b</b> used<br>/ mg (μmol) | amount of IBr used<br>/ mg (μmol) | amount and ratio of products <b>4b</b> , <b>4c</b> and <b>4d</b><br>obtained / mg |
|-----------------------------------------|-----------------------------------|-----------------------------------------------------------------------------------|
| 4.3 (5.5)                               | 0.57 (2.7)                        | 3.9; <b>4b</b> : <b>4c</b> : <b>4d</b> = 1 : 0.1 : 0.5                            |
| 18.6 (23.9)                             | 4.2 (0.73)                        | 16.5; <b>4b</b> : <b>4c</b> : <b>4d</b> = 1 : 0.7 : 1.3                           |
| 40.0 (51.4)                             | 12.8 (61.7)                       | 34.3; <b>4b</b> : <b>4c</b> : <b>4d</b> = 1 : 2.6 : 2                             |

The ratio of **4b**, **4c** and **4d** was estimated from the integrated area of signals at δ 8.53 (**4b**), 8.64 (**4c**) and 8.62 (**4d**) in the <sup>1</sup>H NMR spectrum.

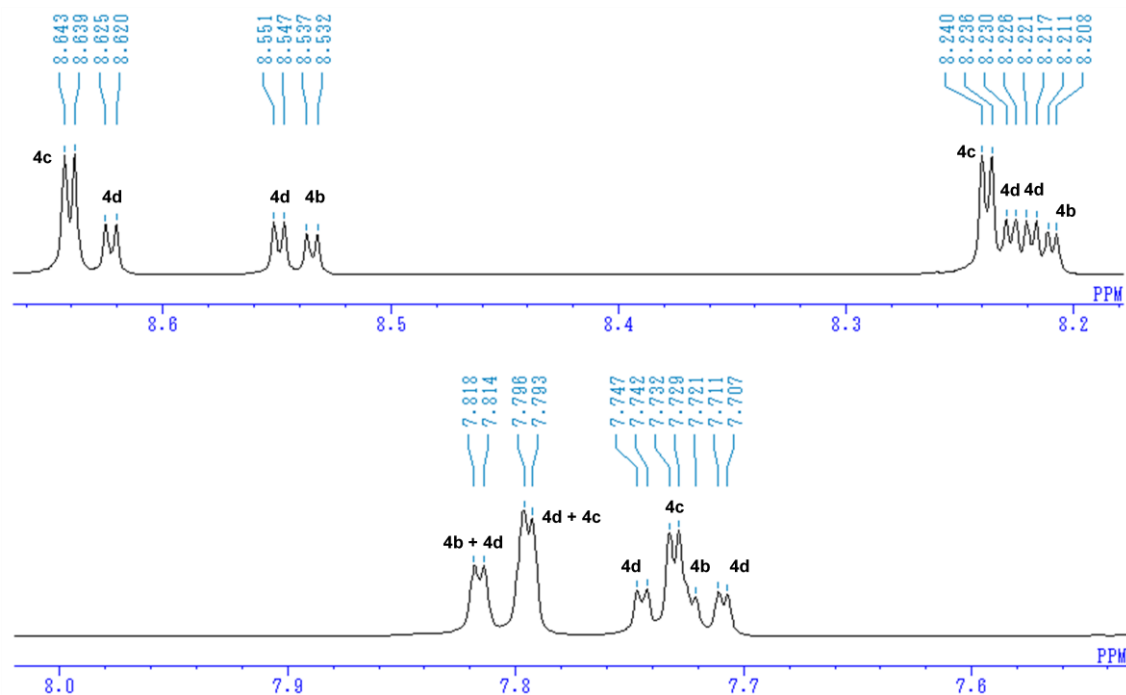

**Fig. S1** <sup>1</sup>H NMR spectrum of a mixture of **4b**, **4c** and **4d**



#### 4. UV-vis spectra of **2d** in various solvents

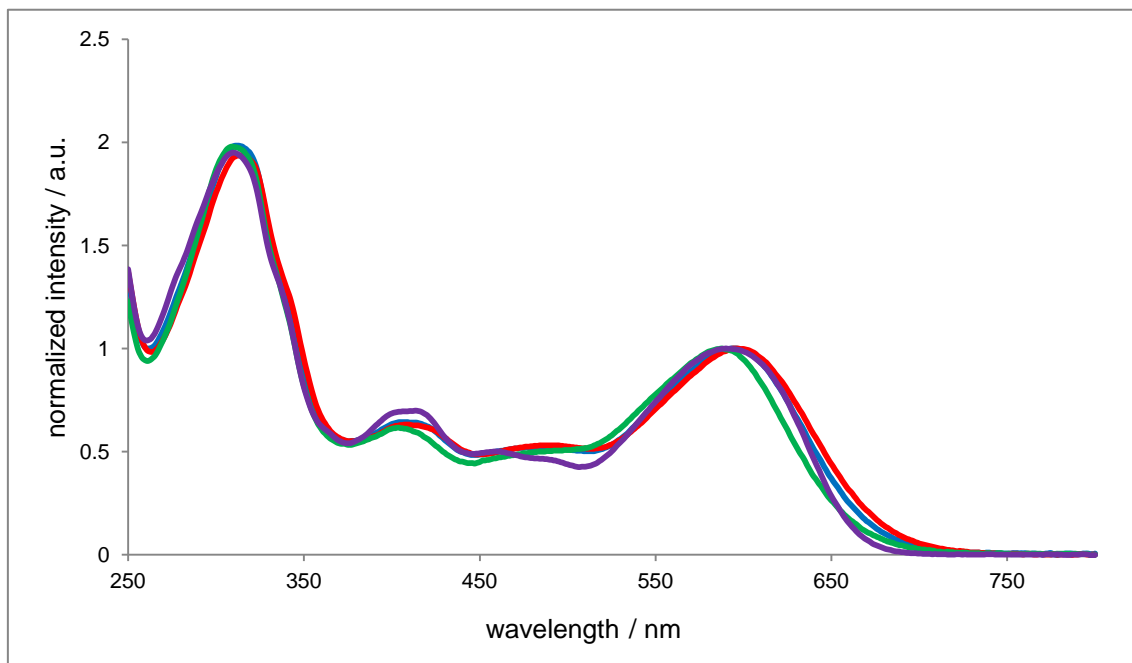

**Fig. 2** UV-vis absorption spectra of **2d** in  $\text{CH}_2\text{Cl}_2$  (red), cyclohexane (purple), THF (blue) and  $\text{CH}_3\text{CN}$  (green)

#### 5. Fluorescence spectra of **2a** and **2b**

Compounds **2a** and **2b** exhibited fluorescence emission at 619 nm ( $\lambda_{\text{ex}} = 545$  nm,  $\Phi = 0.05$ ) and 649 nm ( $\lambda_{\text{ex}} = 500$  nm,  $\Phi = 0.05$ ), respectively, whereas **2c** and **2d** did not. Measurements were performed with  $5.36 \times 10^{-6}$  M solution for **2a** and  $8.73 \times 10^{-6}$  M solution for **2b** under air without degassing. Quantum yields were determined relative to rohdamine B in EtOH ( $\Phi = 0.70$ ).<sup>6</sup>

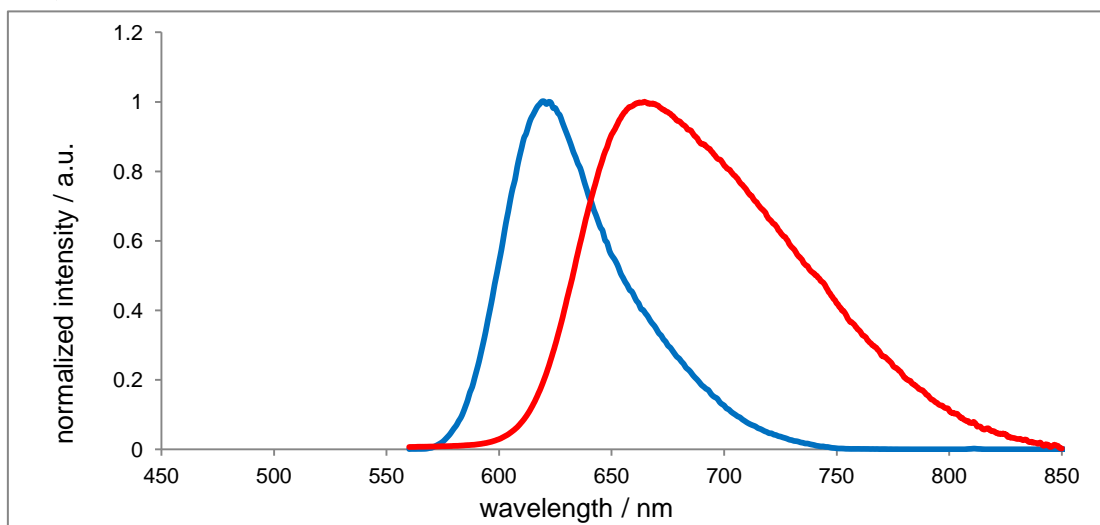

**Fig. S3** Fluorescence spectra of **2a** (blue) and **2b** (red) recorded in  $\text{CH}_2\text{Cl}_2$

### 6. $^1\text{H}$ NMR and $^{13}\text{C}$ NMR spectra for 2a-f, 3b, 4b-c, 5 and 6

#### $^1\text{H}$ NMR spectrum of 2a

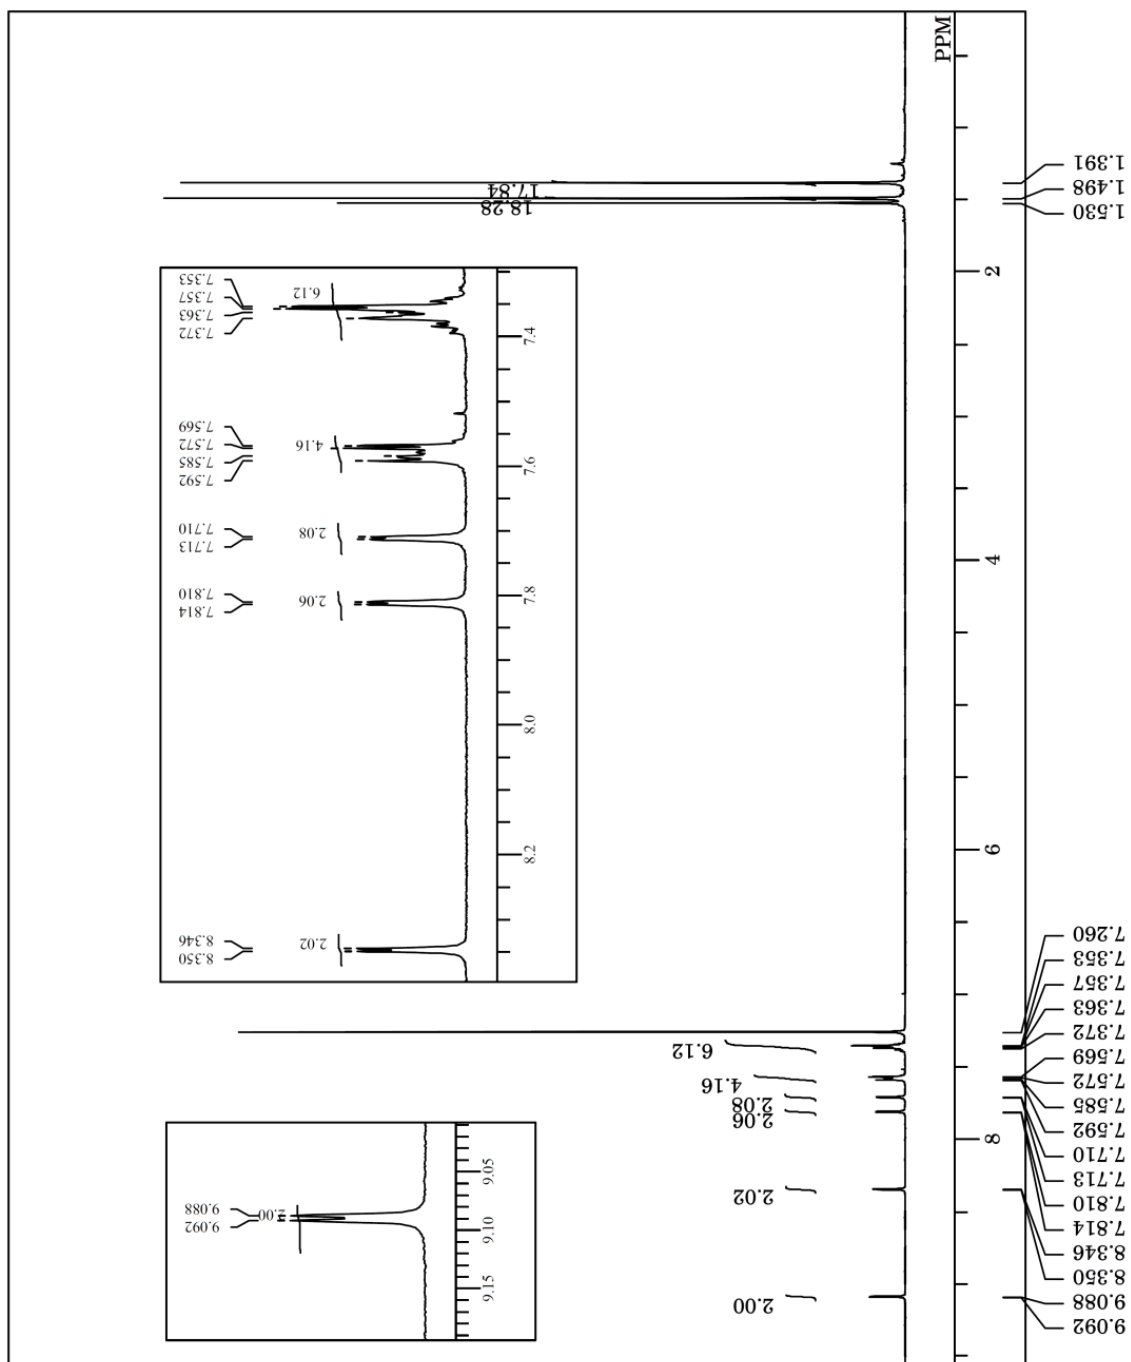

$^{13}\text{C}$  NMR spectrum of **2a**

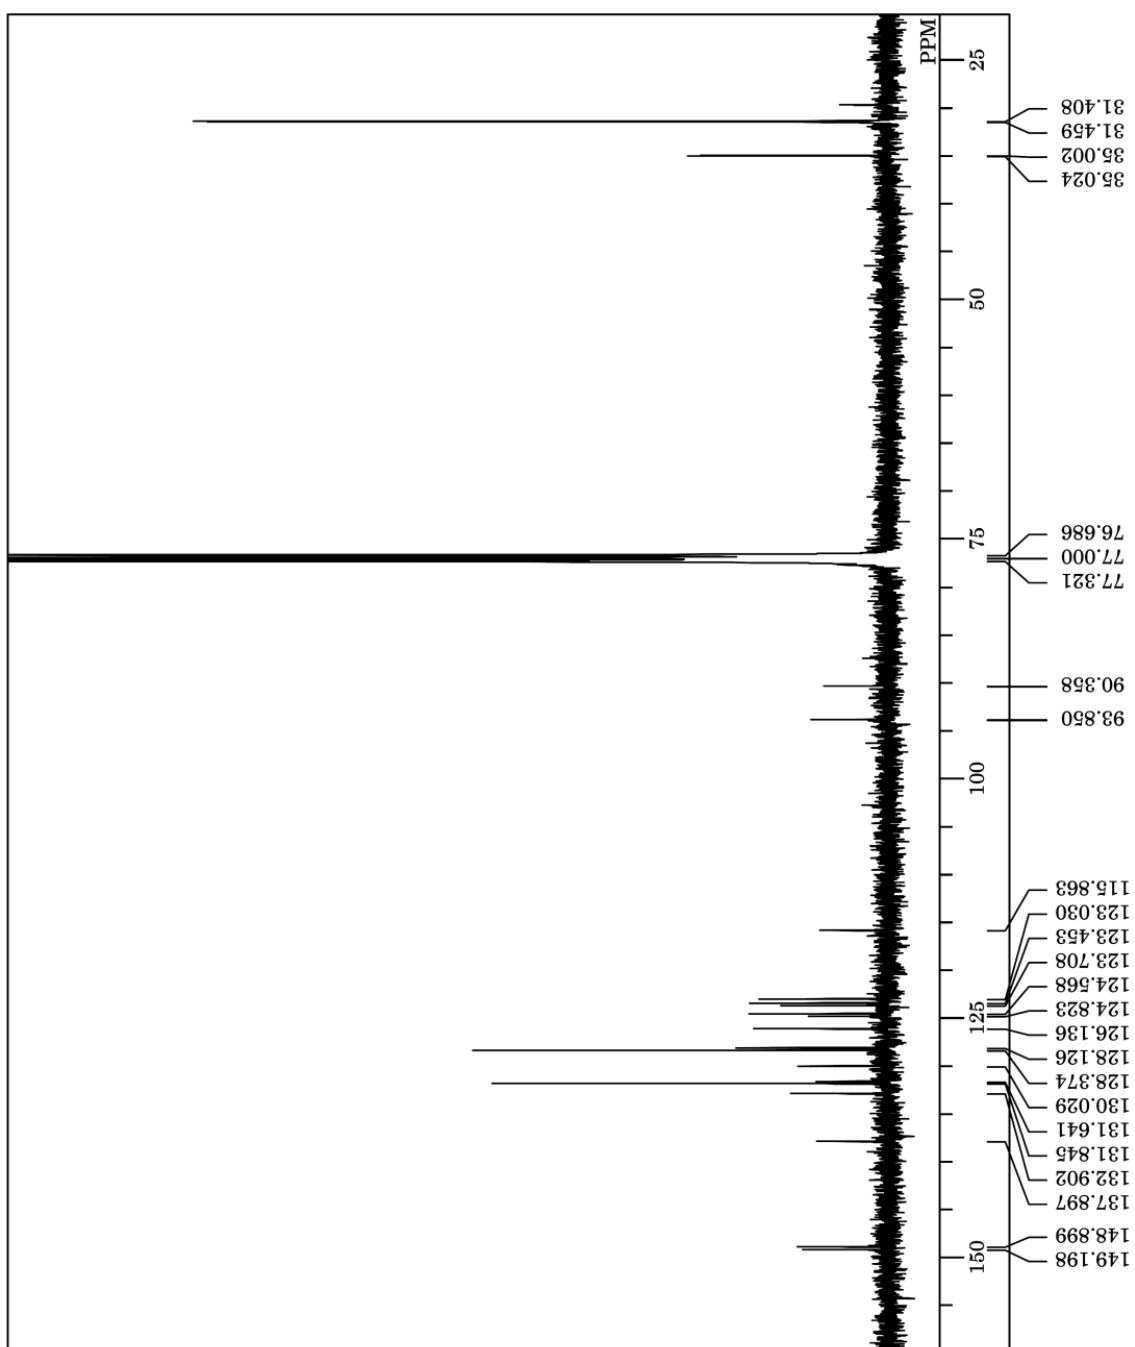

$^1\text{H}$  NMR spectrum of **2b**

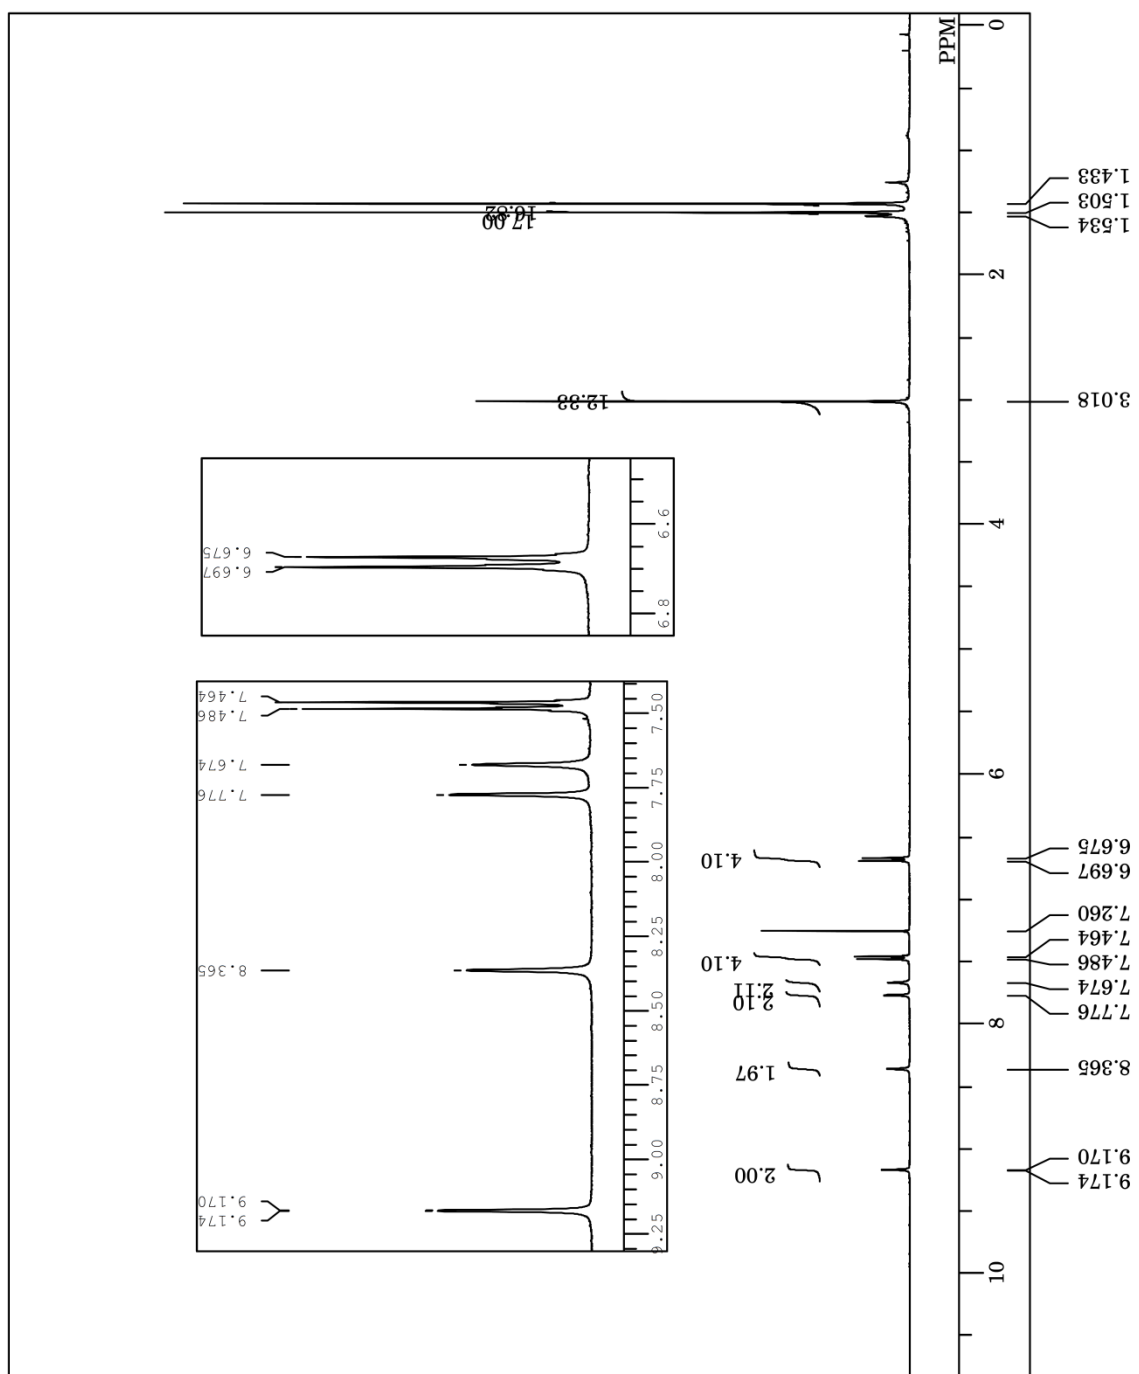

$^{13}\text{C}$  NMR spectrum of **2b**

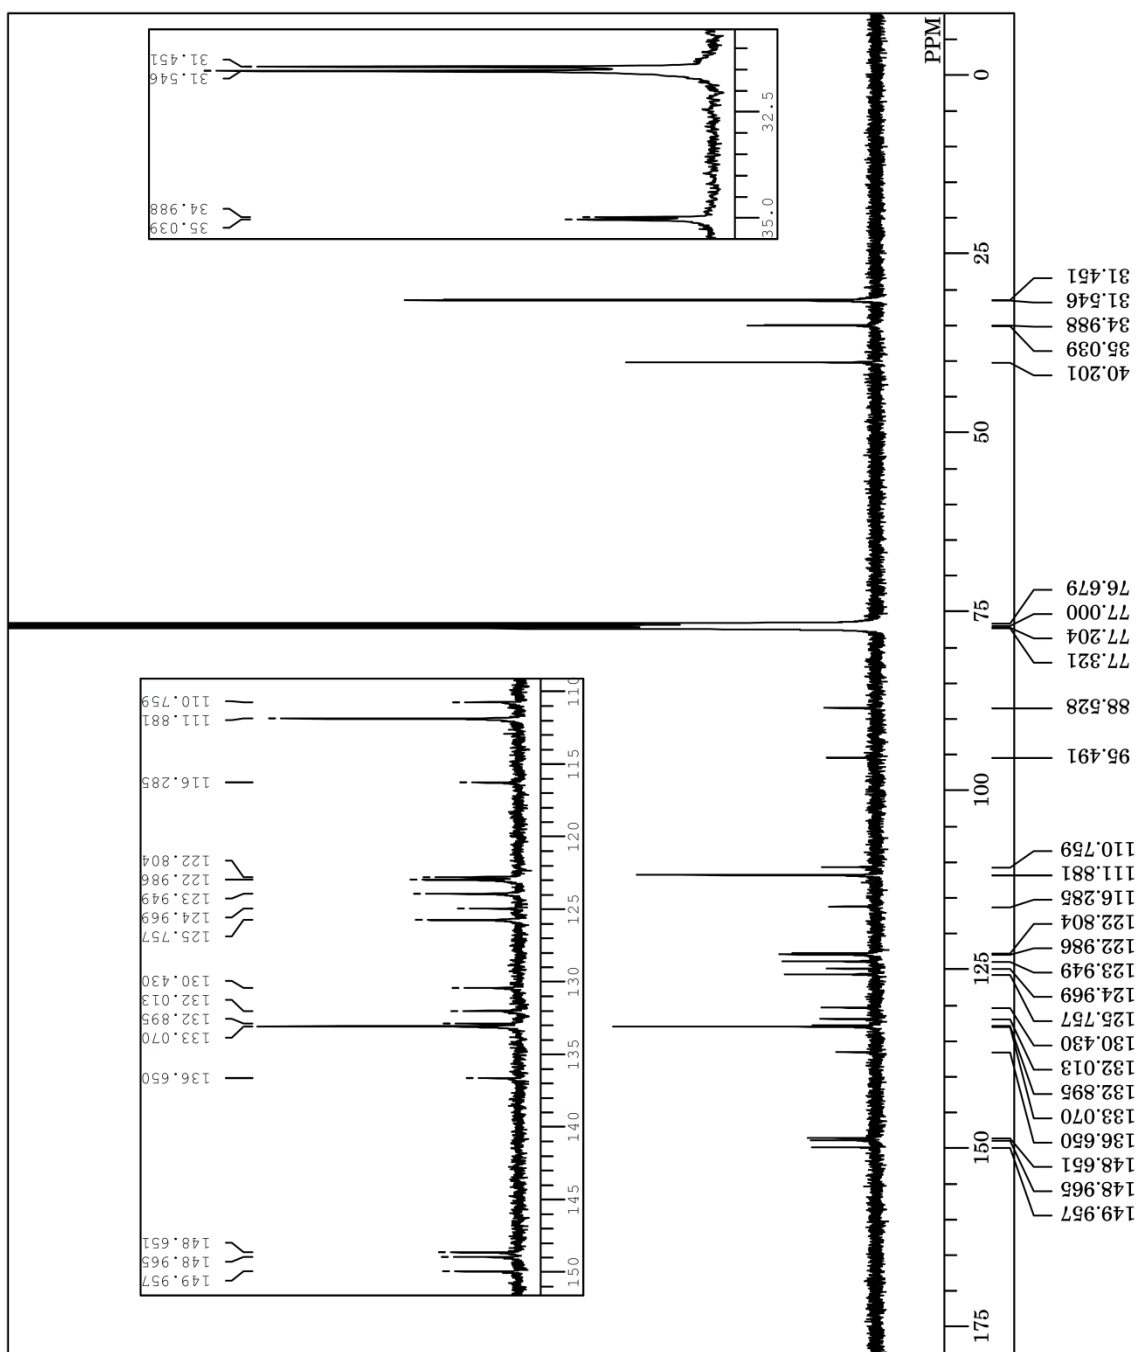

<sup>1</sup>H NMR spectrum of **2c**

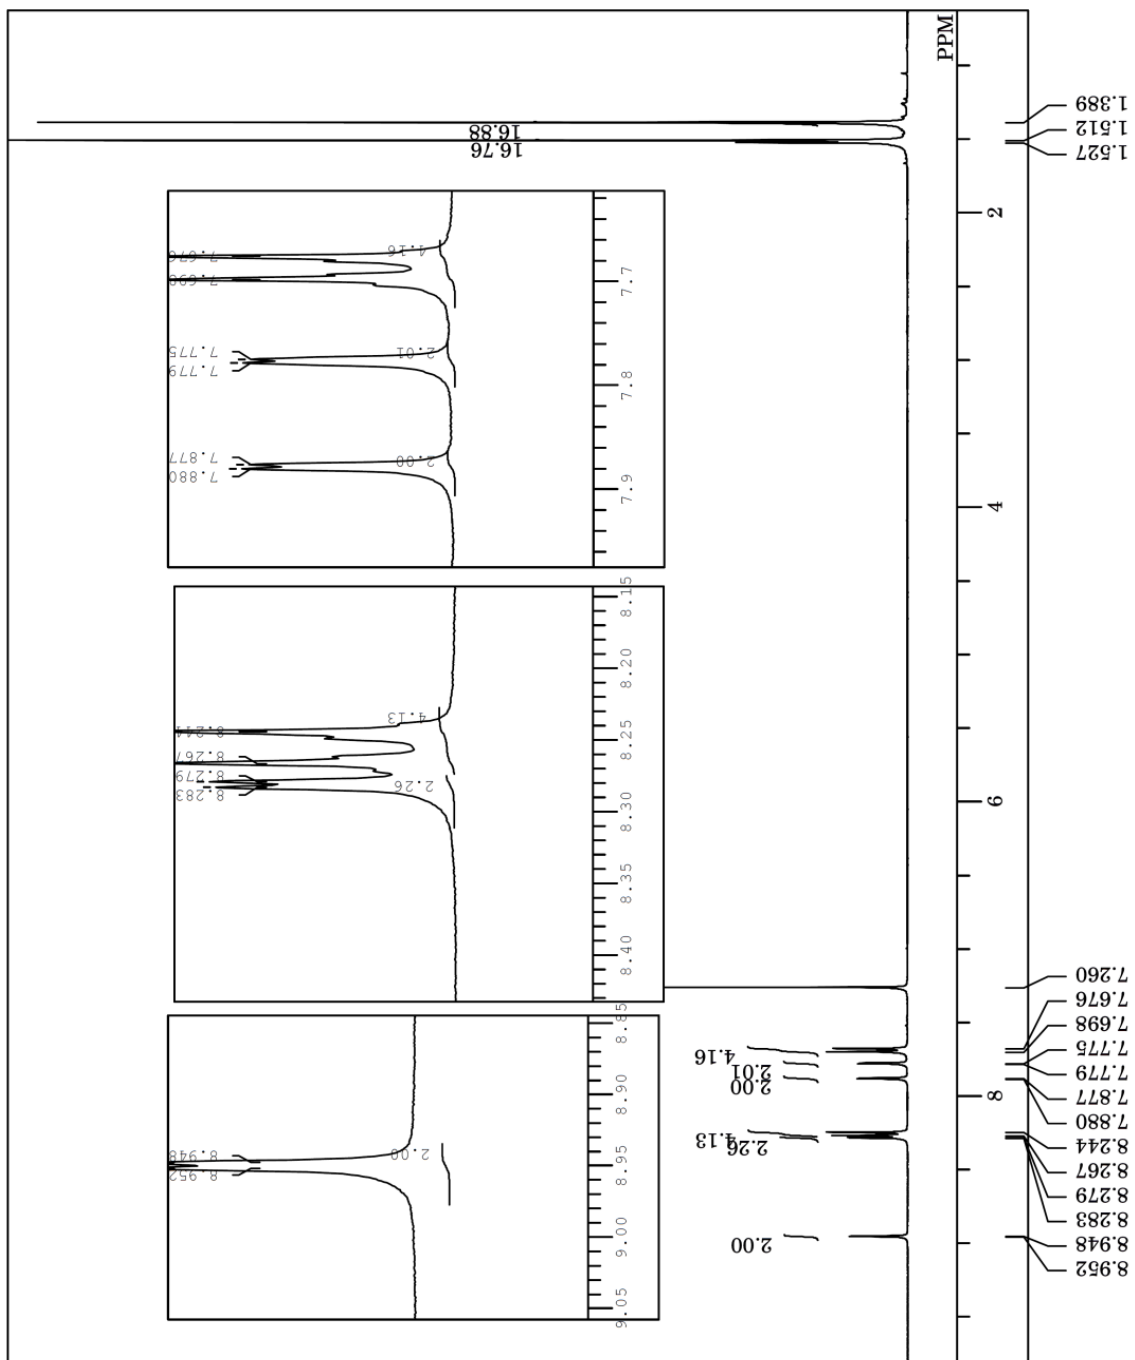

$^{13}\text{C}$  NMR spectrum of **2c**

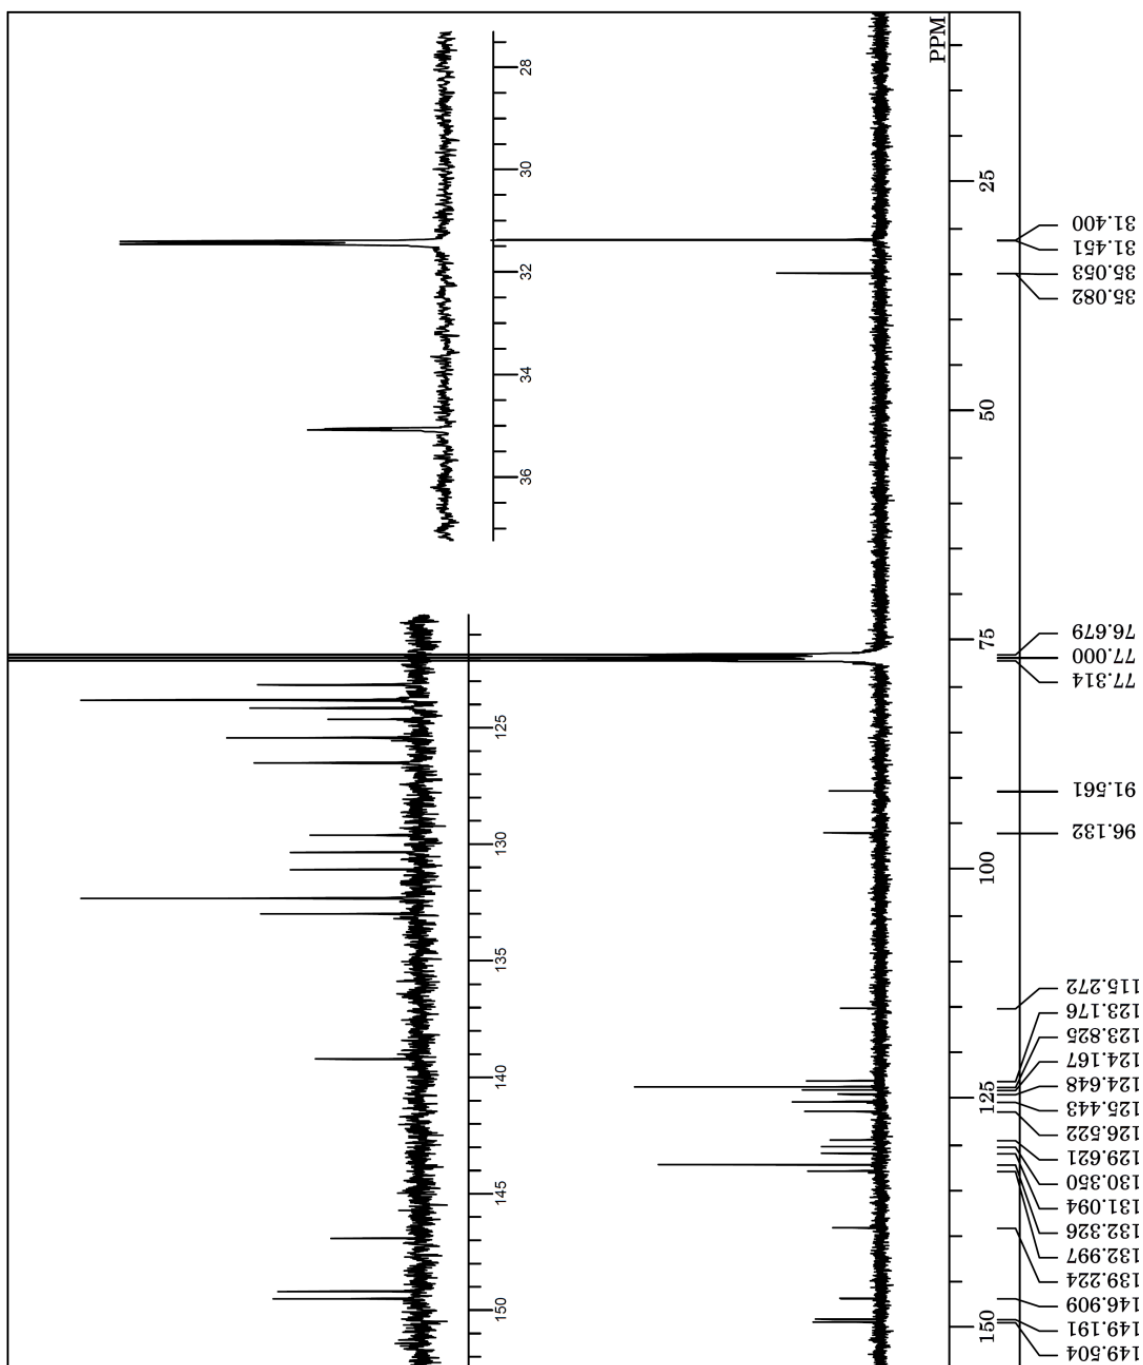

### $^1\text{H}$ NMR spectrum of **2d**

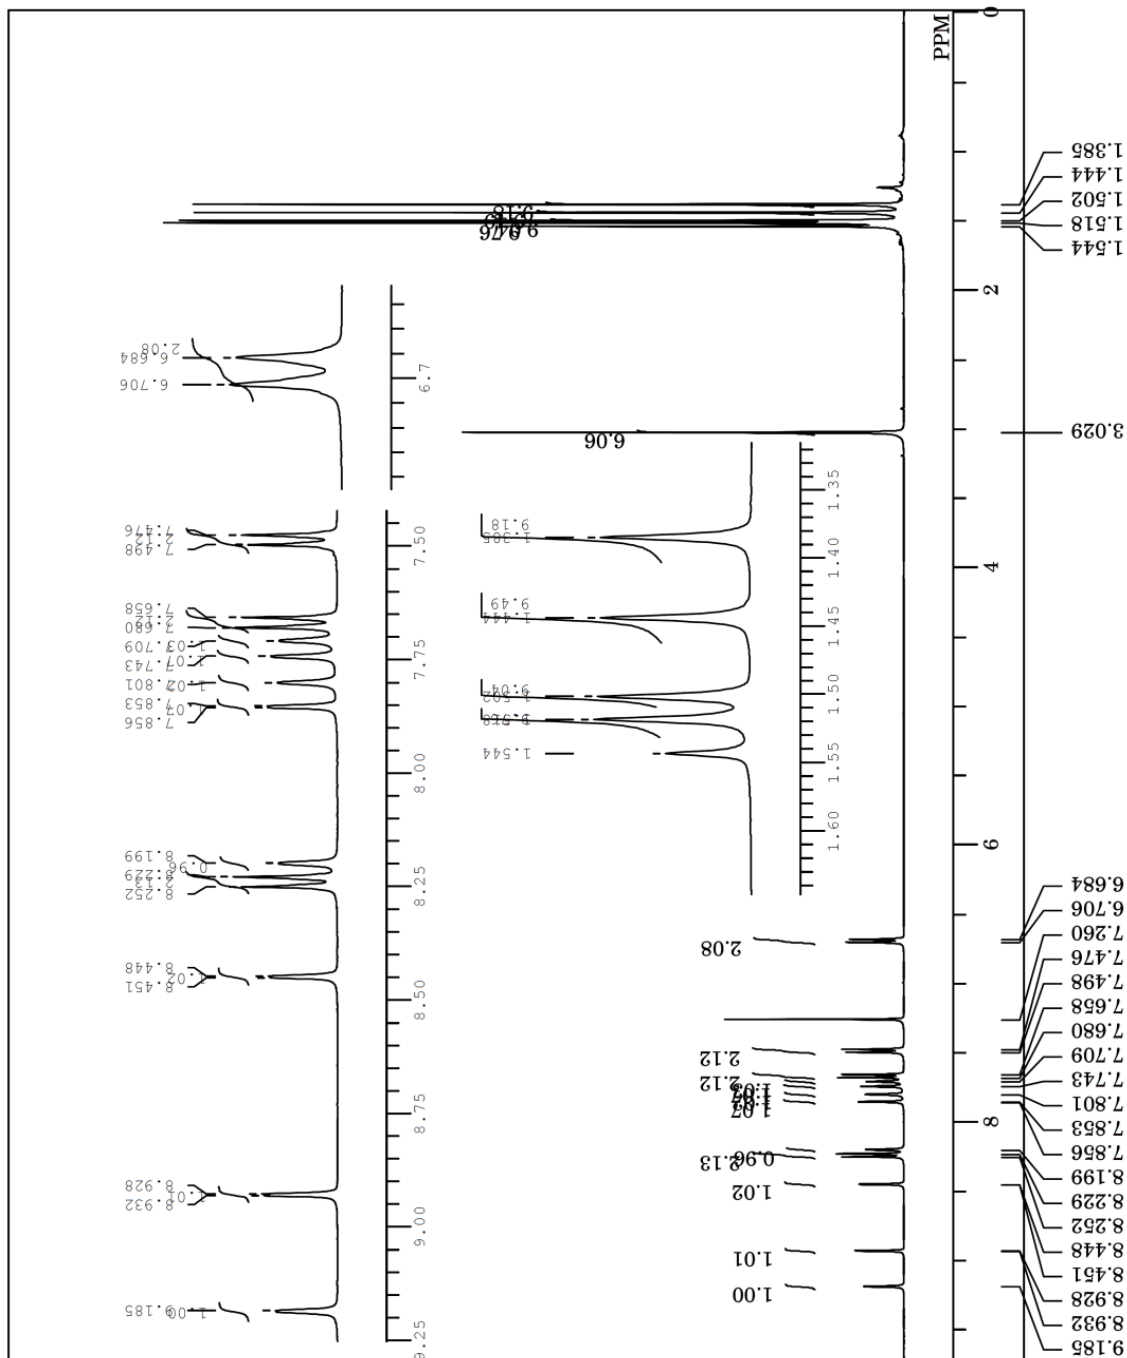



$^{13}\text{C}$  NMR spectrum of **2d**

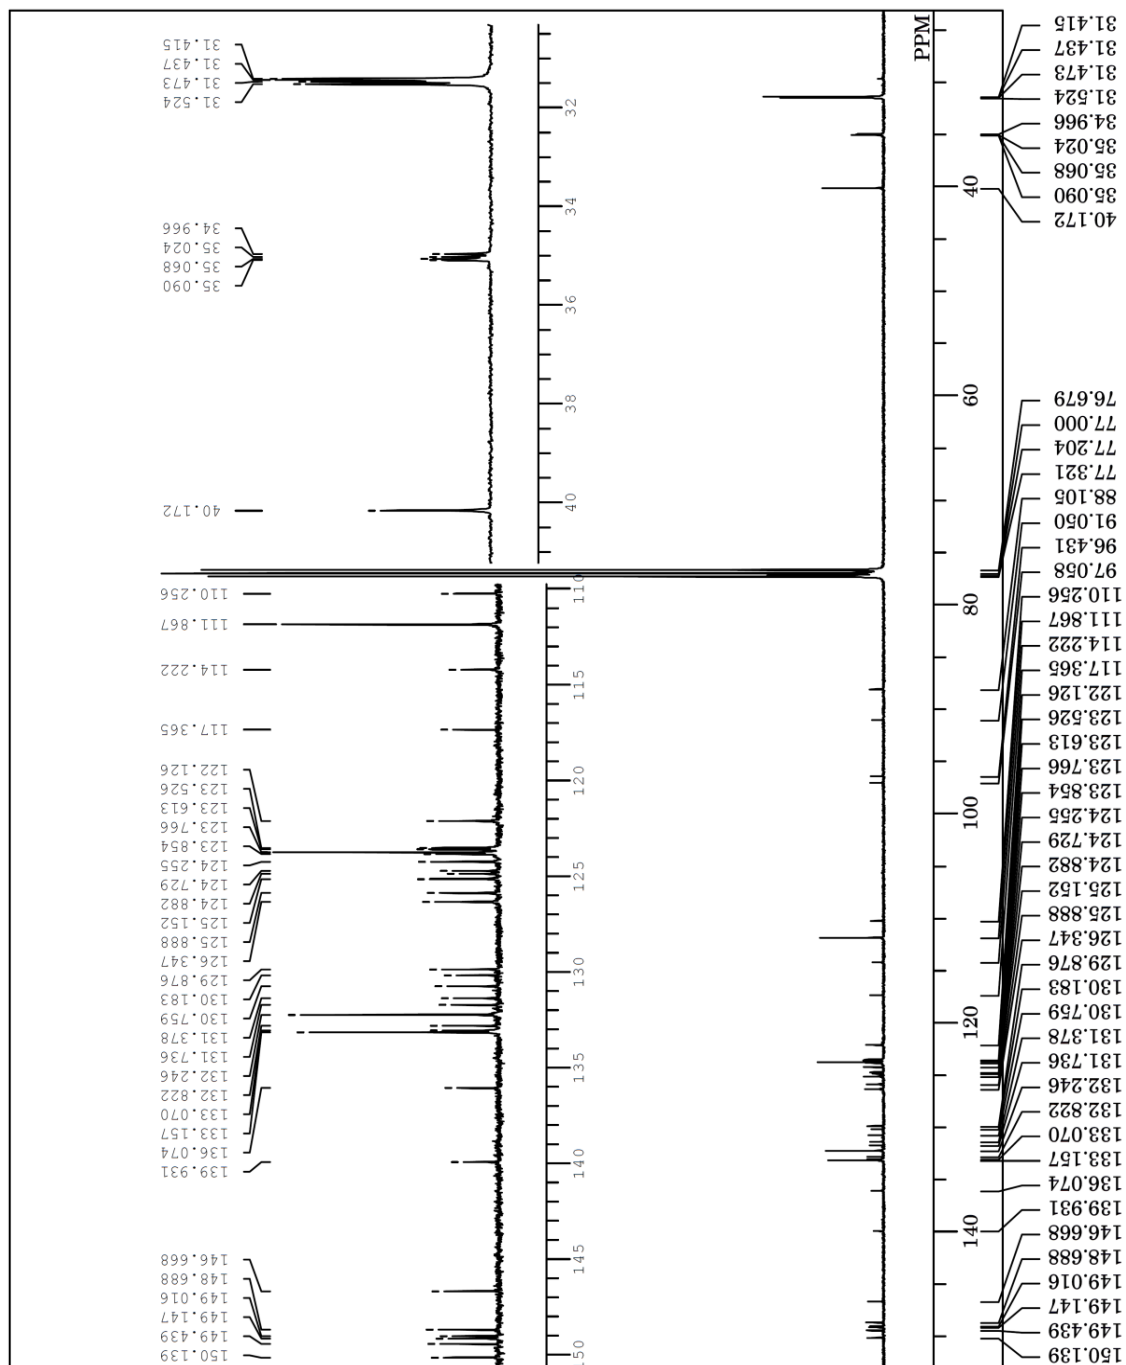

$^1\text{H}$  NMR spectrum of **2e**

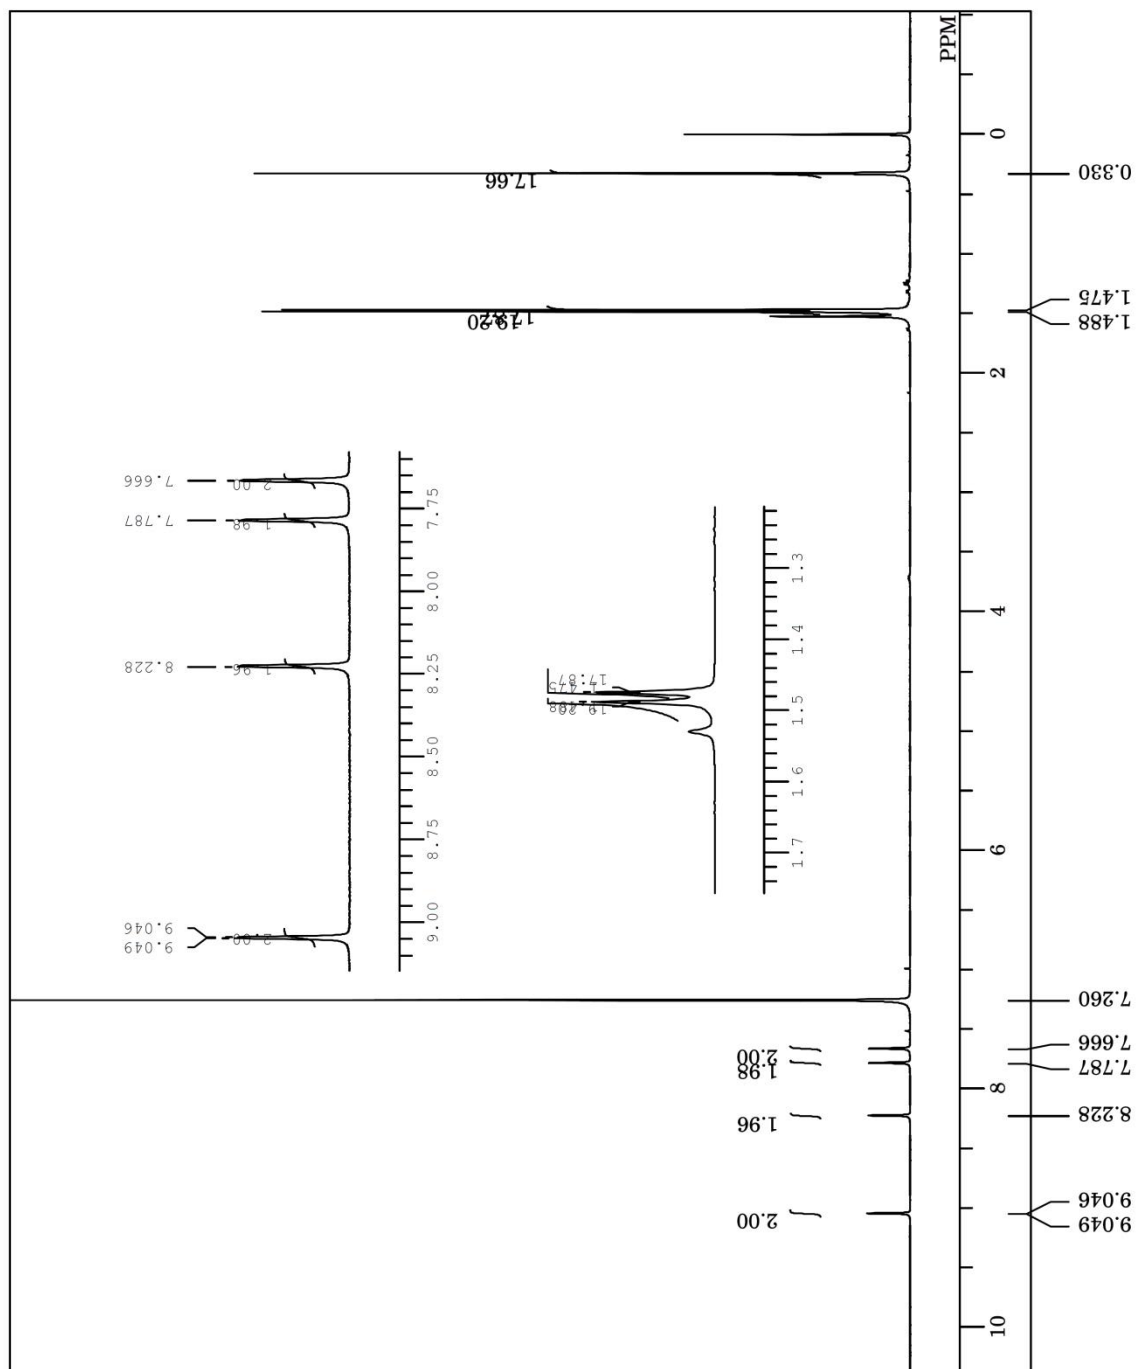

$^{13}\text{C}$  NMR spectrum of **2e**

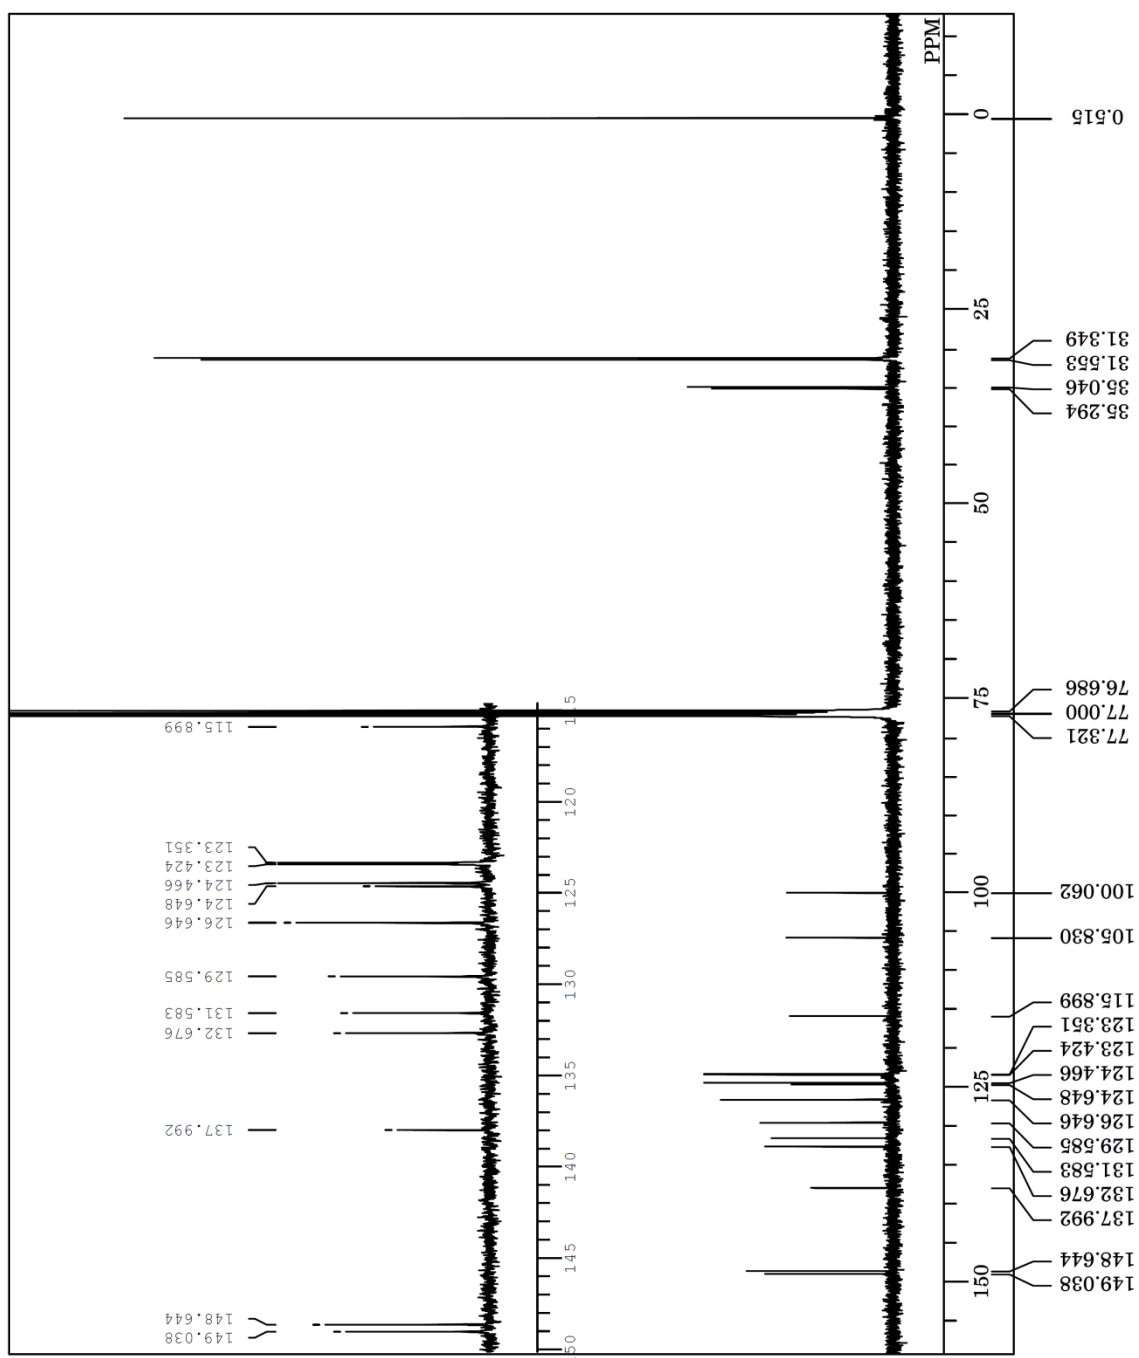

$^1\text{H}$  NMR spectrum of **2f**

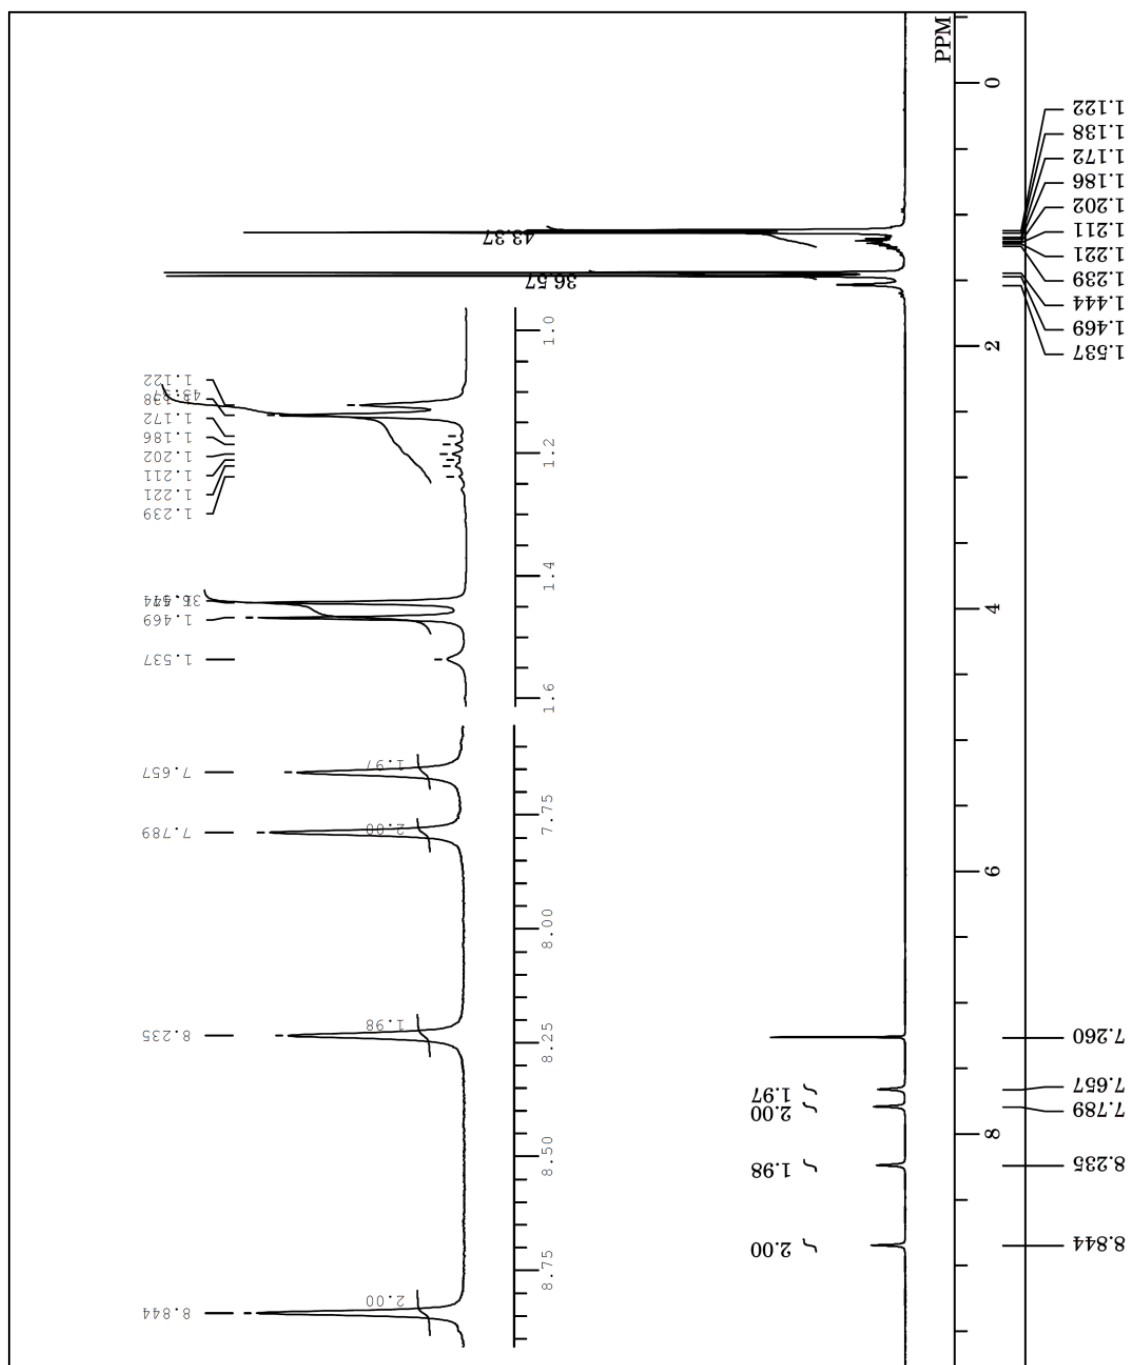

$^{13}\text{C}$  NMR spectrum of **2f**

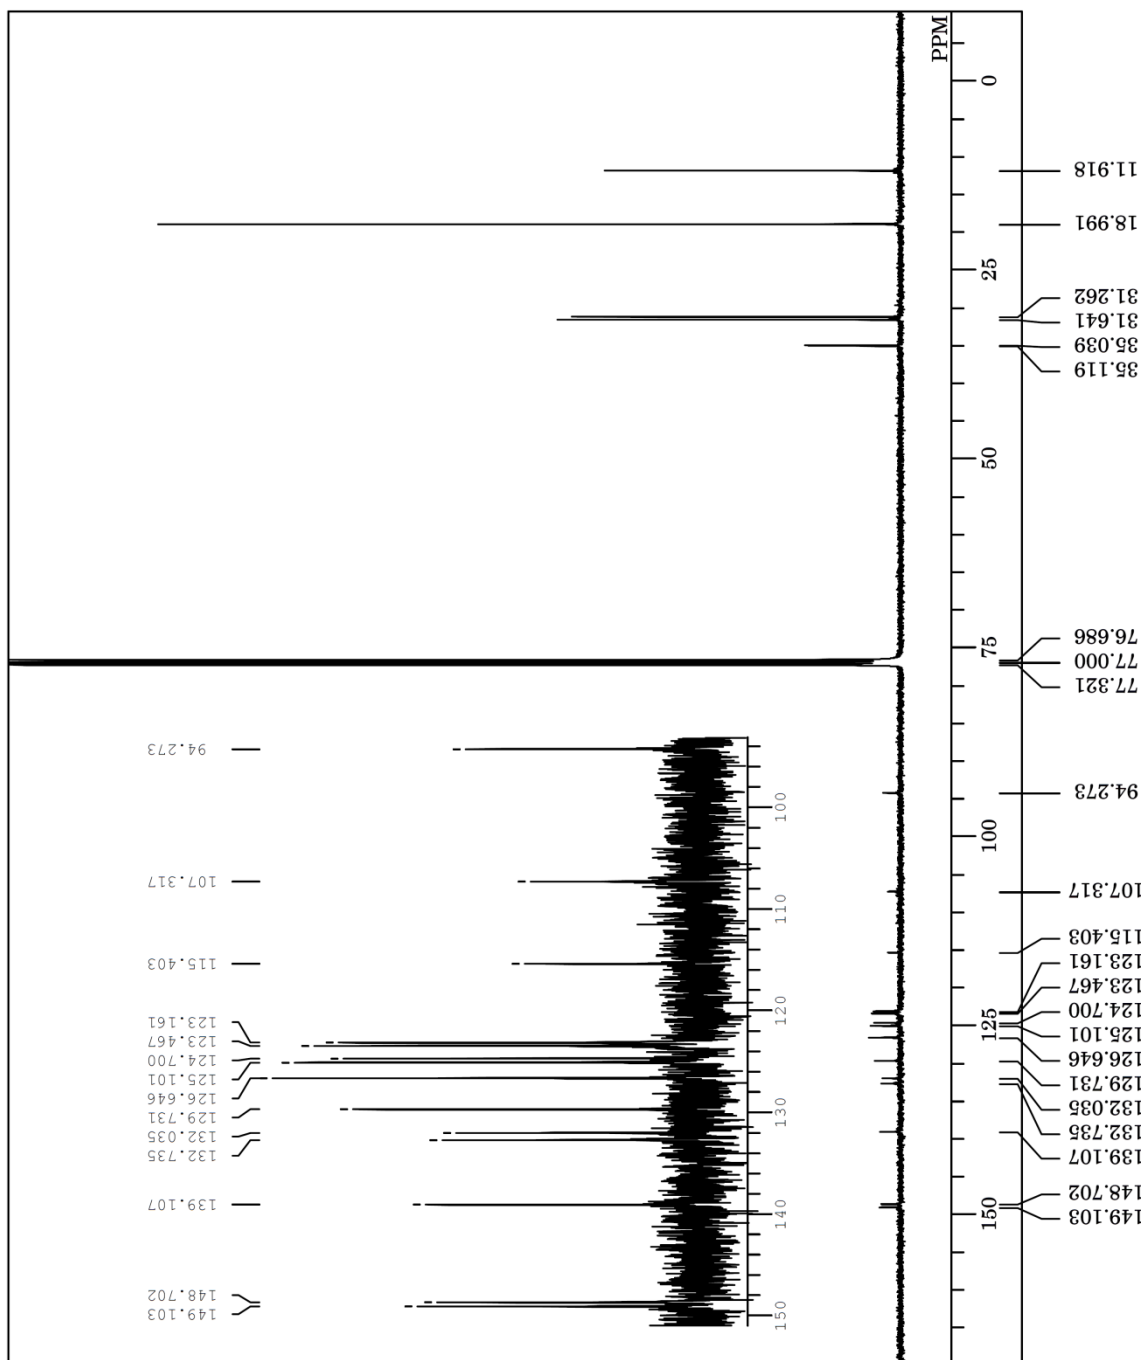

$^1\text{H}$  NMR spectrum of **6**

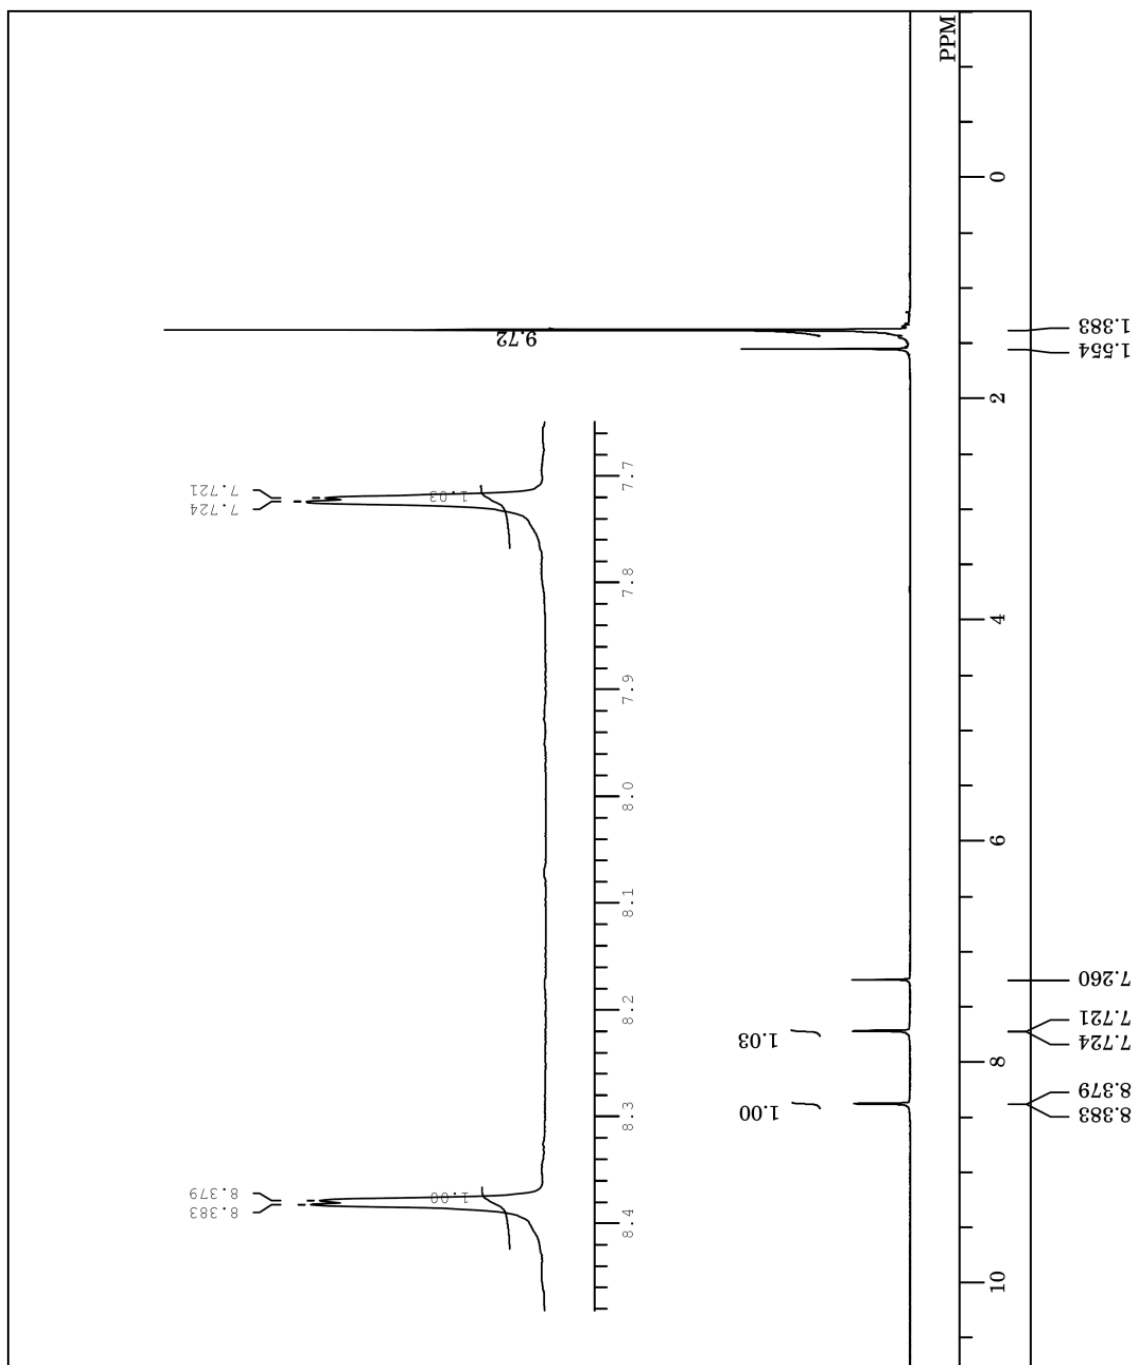

$^{13}\text{C}$  NMR spectrum of **6**

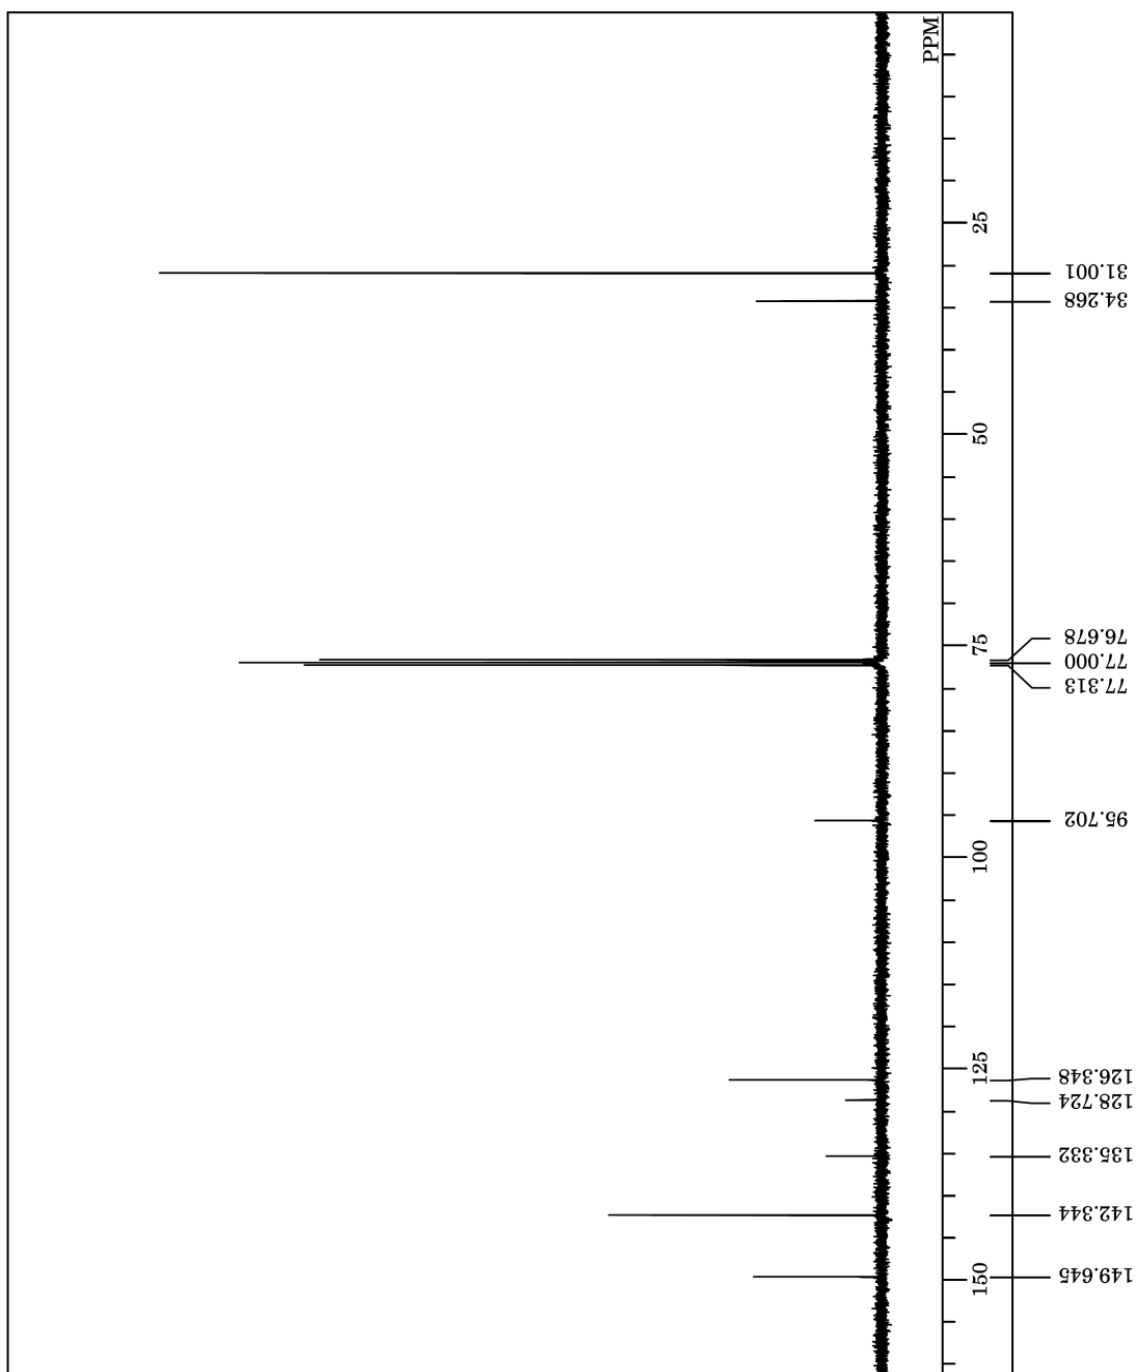

$^1\text{H}$  NMR spectrum of **7**

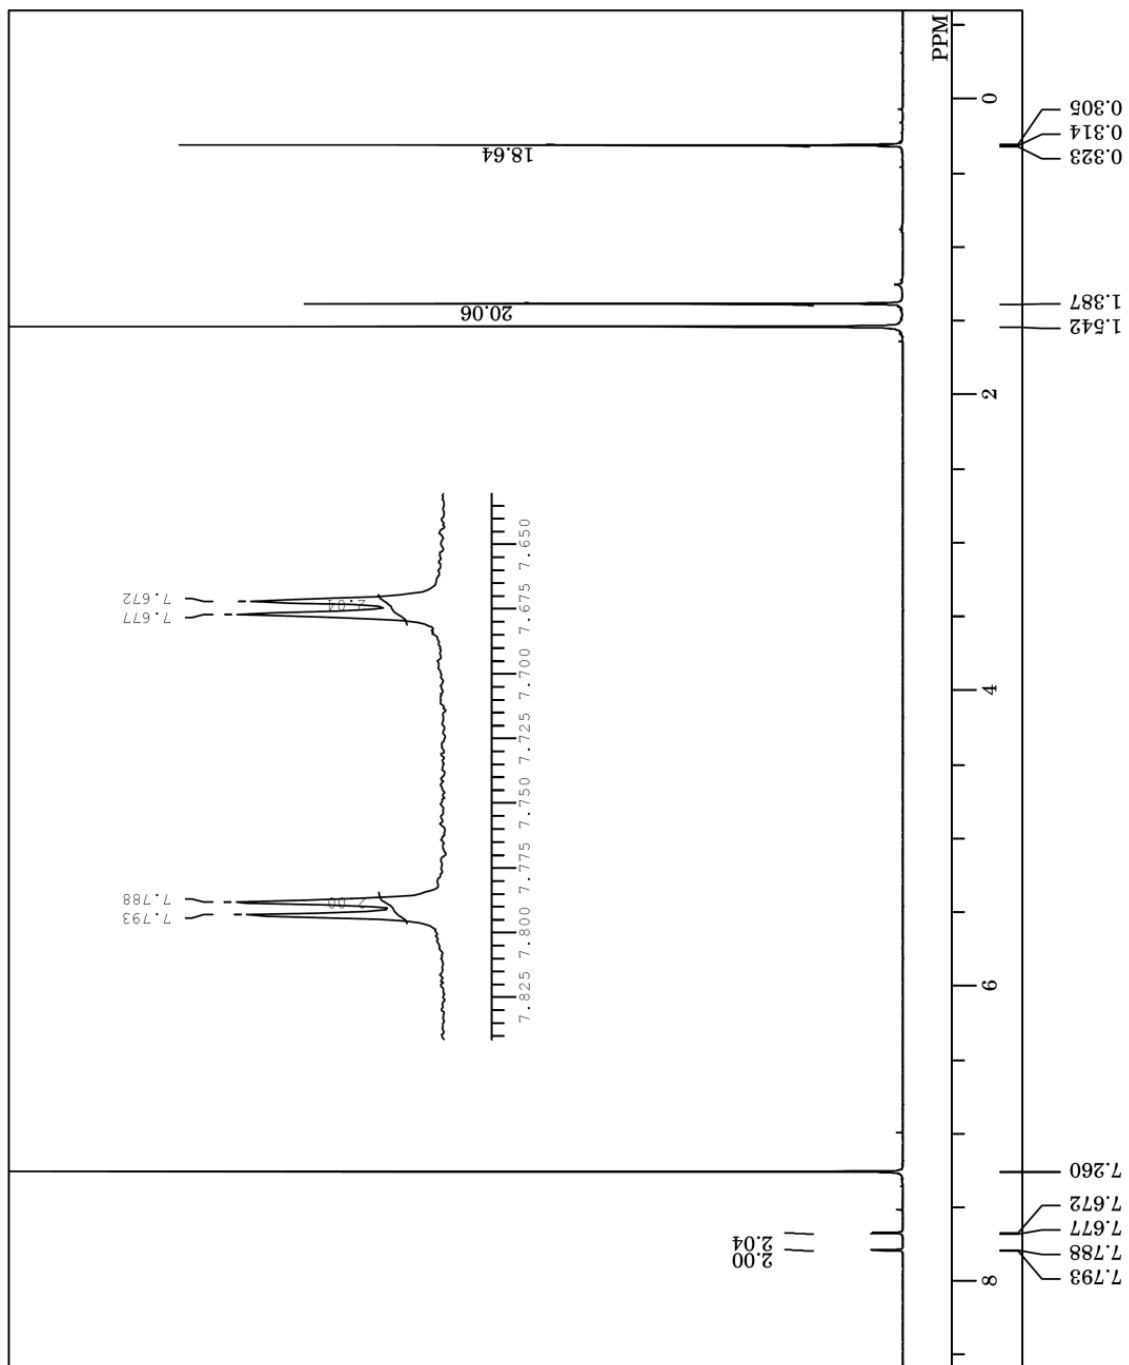



$^{13}\text{C}$  NMR spectrum of **7**

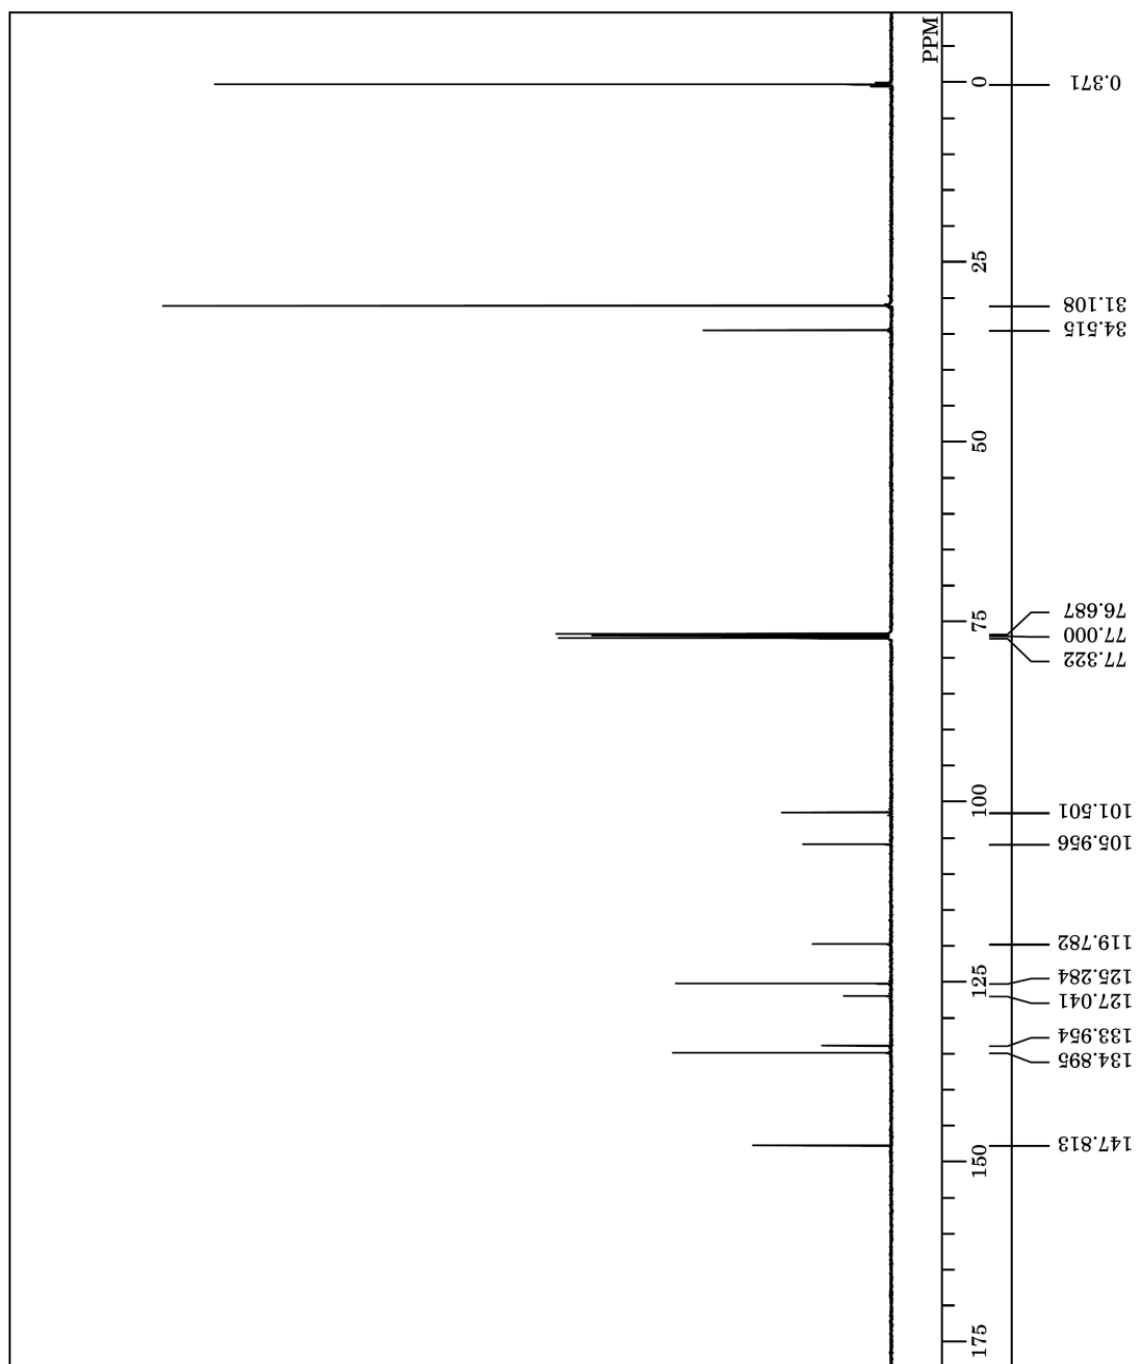

$^1\text{H}$  NMR spectrum of **3b**

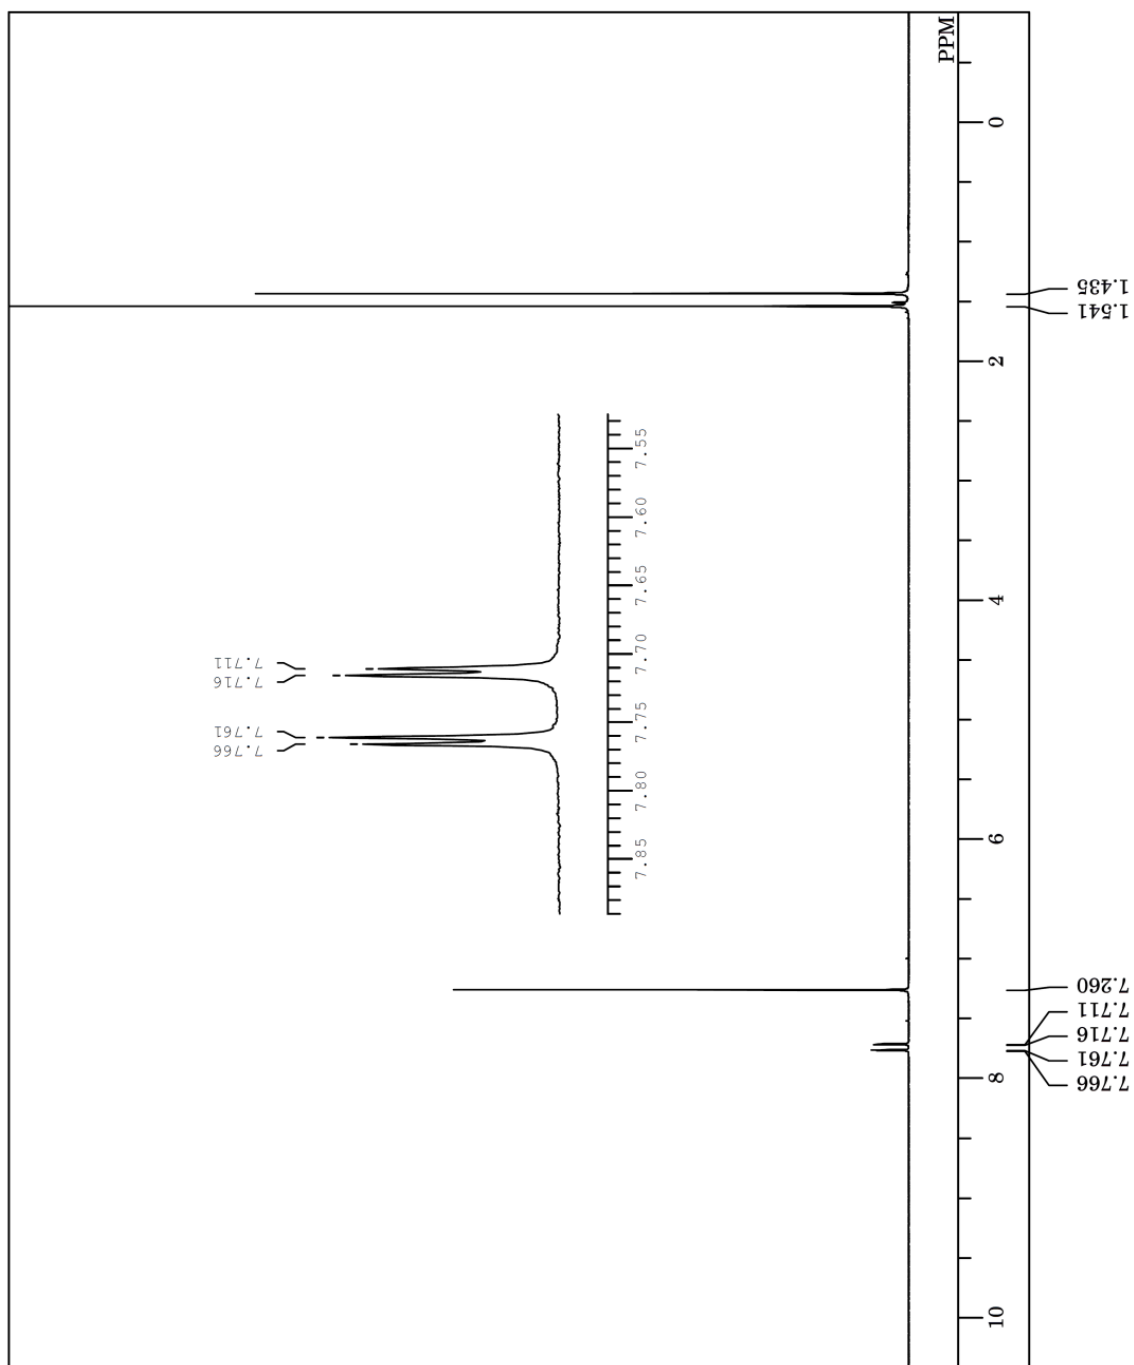

$^{13}\text{C}$  NMR spectra of **3b**

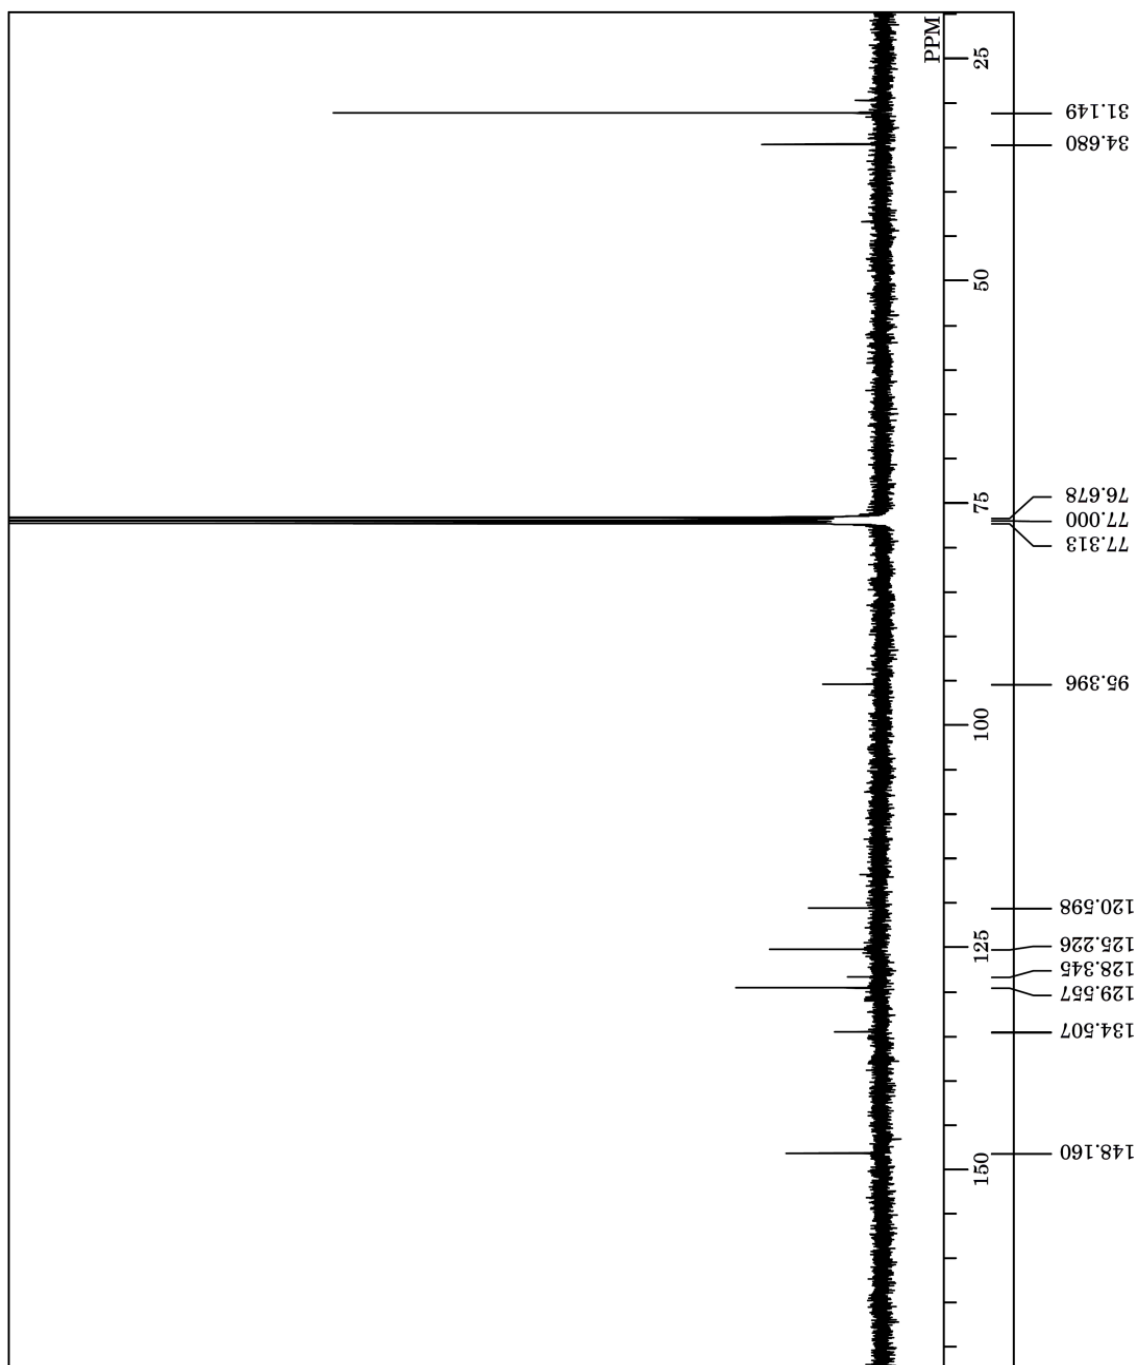

$^1\text{H}$  NMR spectrum of **4b**

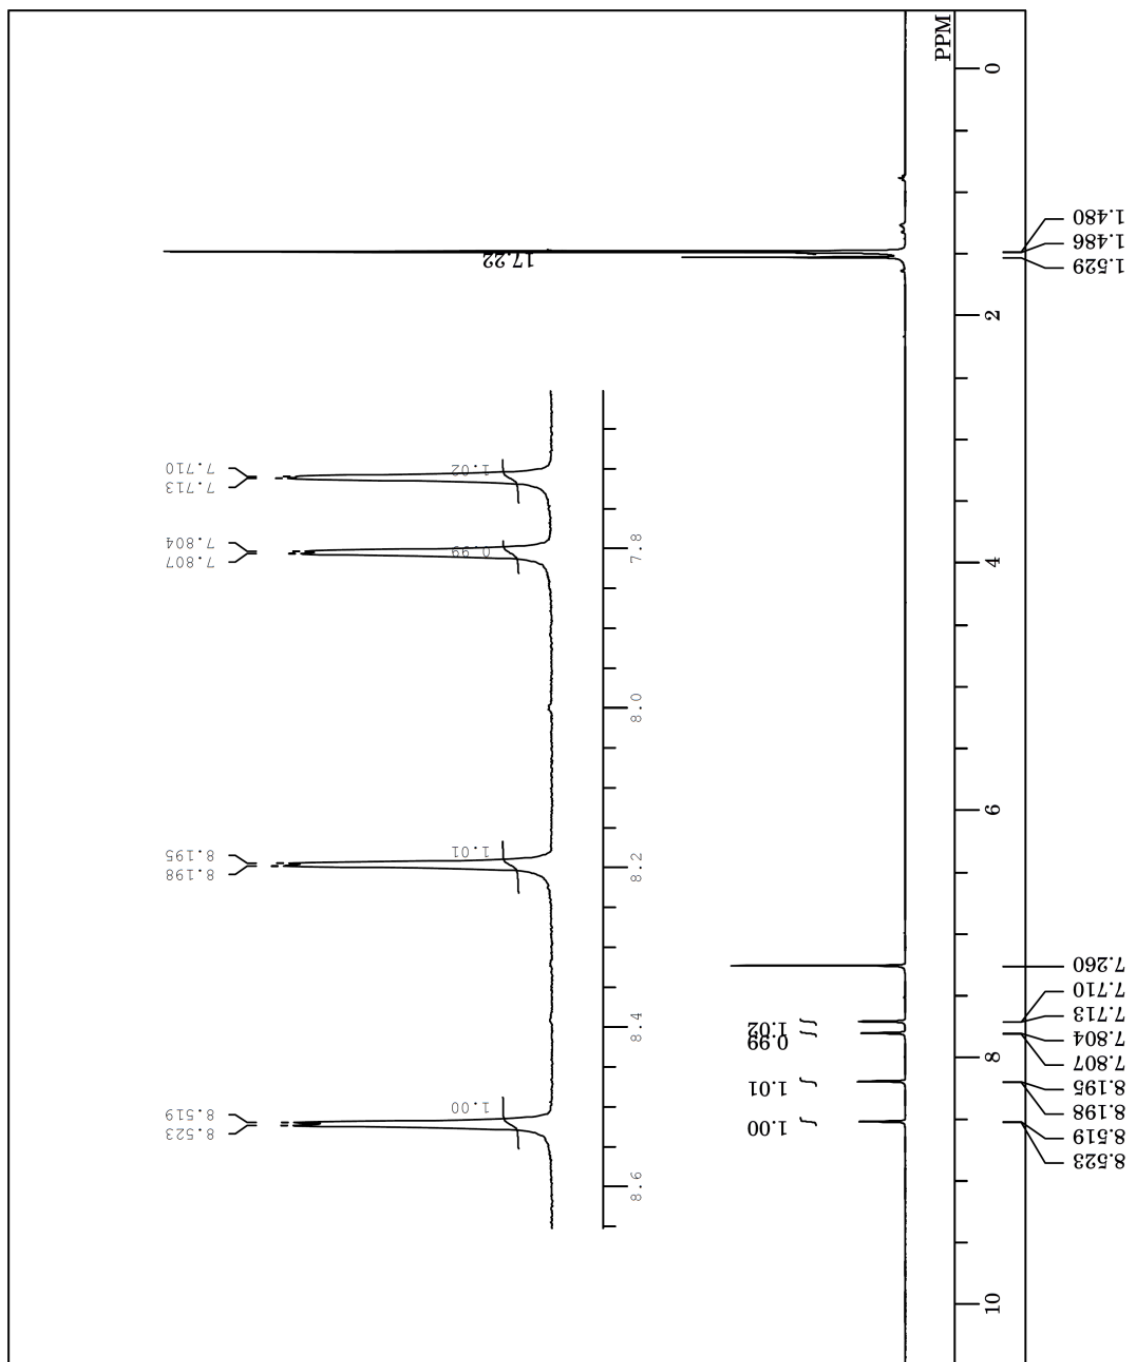

$^{13}\text{C}$  NMR spectra of **4b**

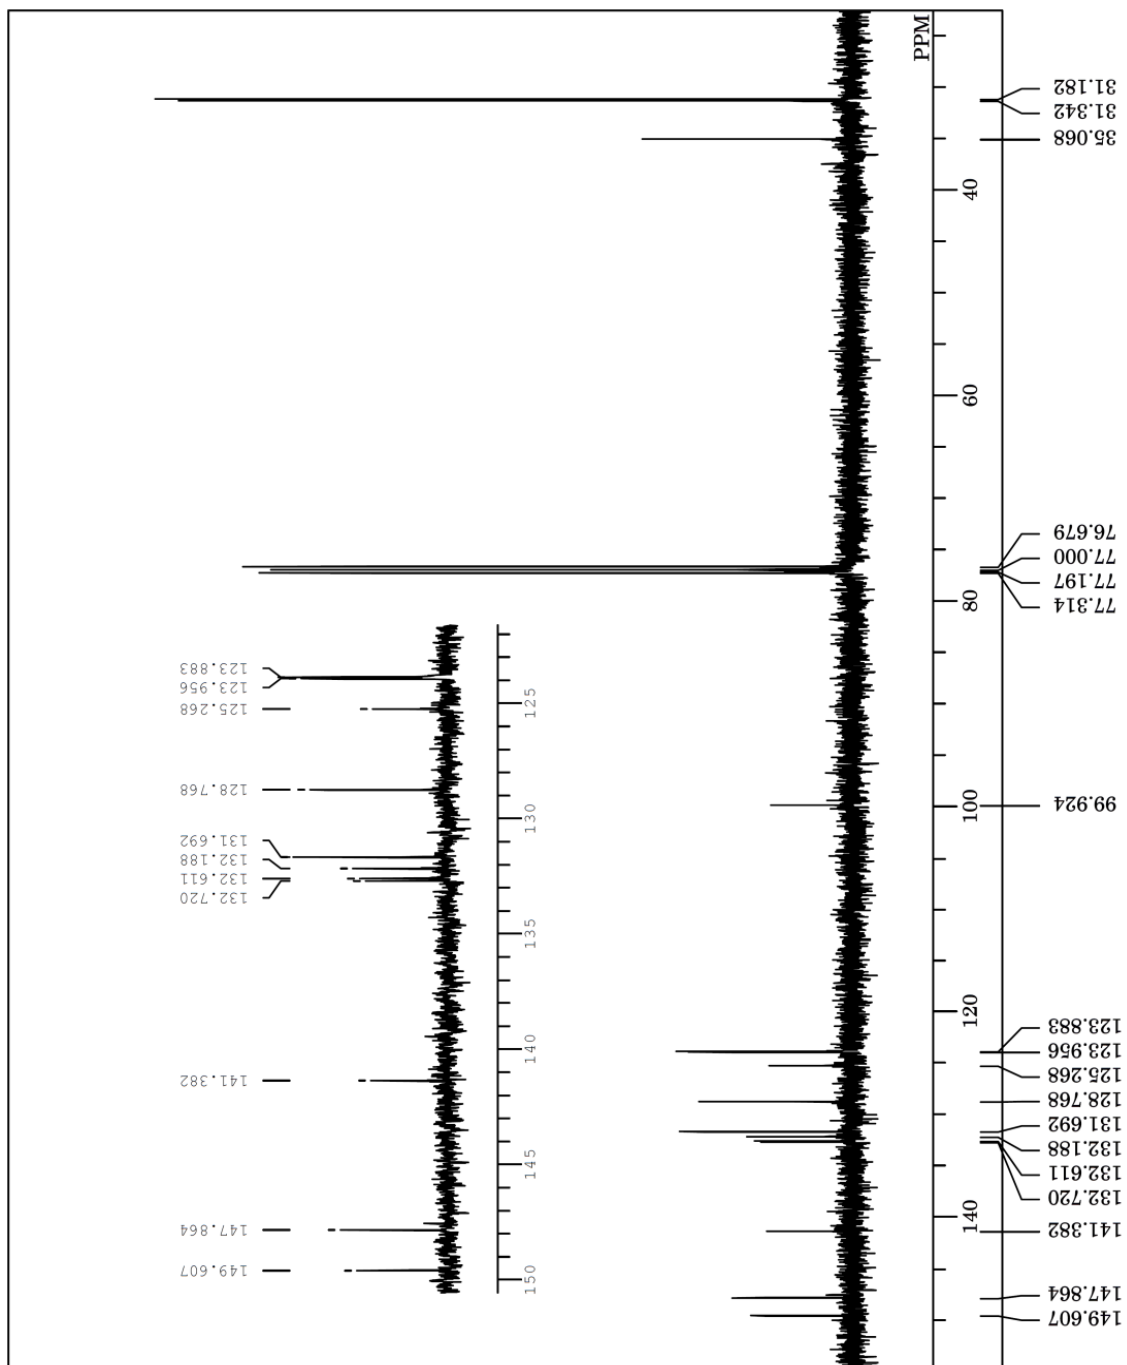

$^1\text{H}$  NMR spectrum of **4c**

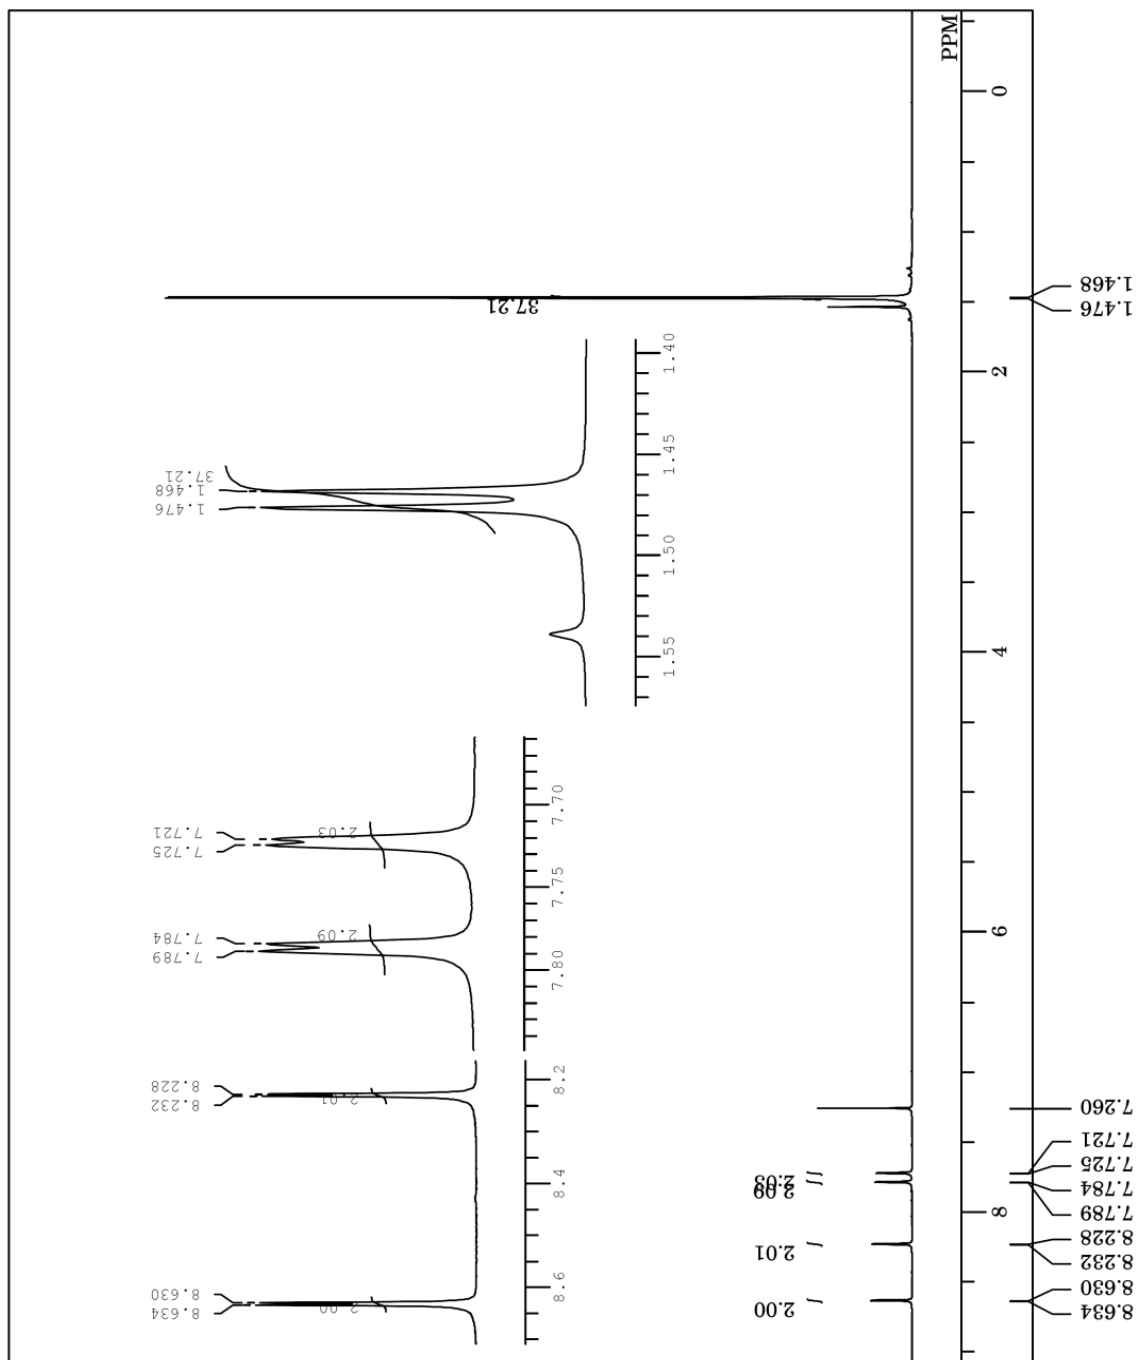

$^{13}\text{C}$  NMR spectrum of **4c**

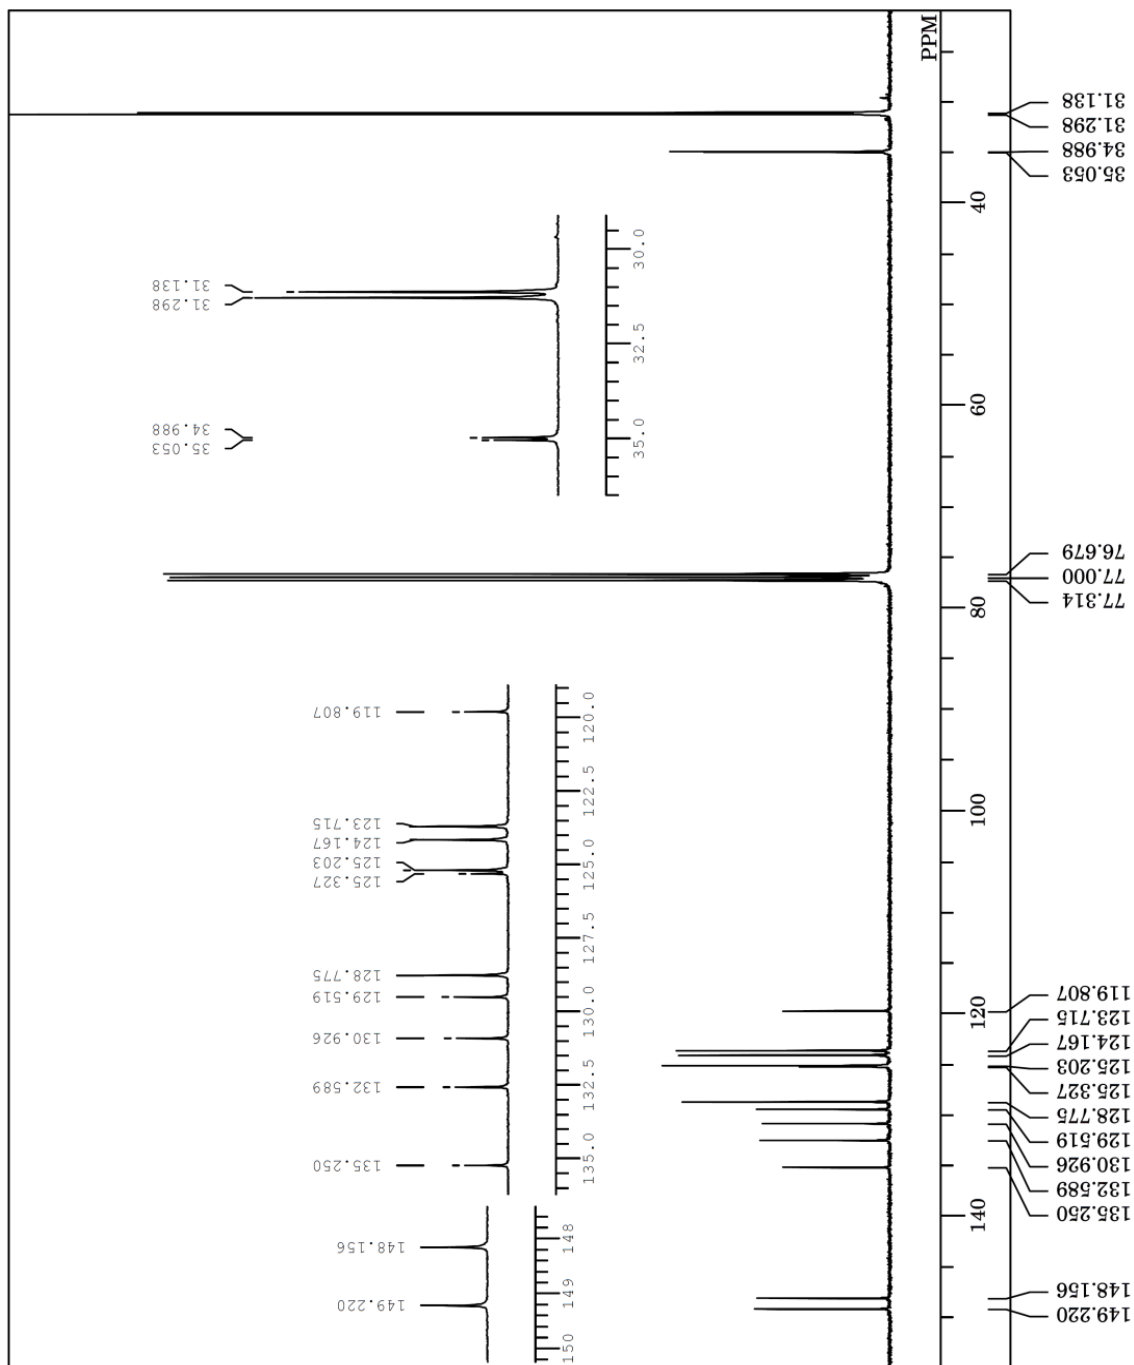

## 7. Cartesian coordinates for optimized geometry of zethrene derivatives

*tert*-Butyl groups were replaced by hydrogen for simplicity reason.

### 7,14-Bis(phenylethynyl)zethrene

C<sub>2</sub> symmetry

SCF Done: E (RB+HF-LYP) = -1537.45034023

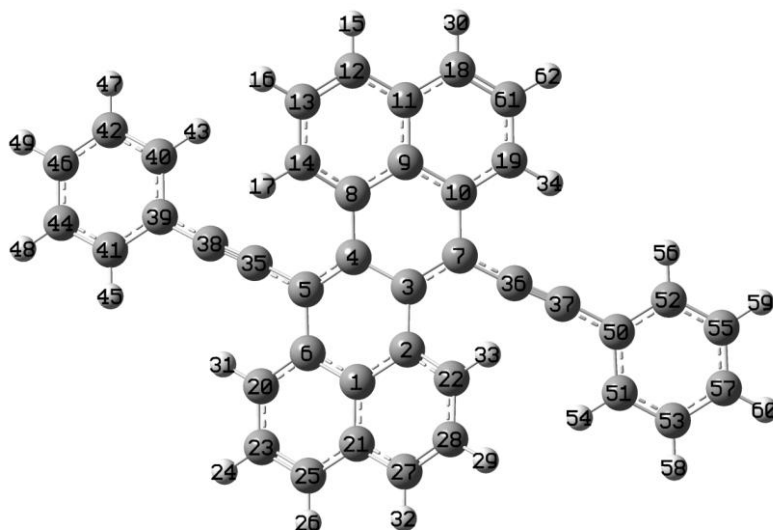

Standard orientation

| Center Number | Atomic Number | Atomic Type | X         | Y         | Z         |
|---------------|---------------|-------------|-----------|-----------|-----------|
| 1             | 6             | 0           | 2.566898  | 0.347557  | -0.546040 |
| 2             | 6             | 0           | 1.741581  | -0.783909 | -0.821431 |
| 3             | 6             | 0           | 0.290764  | -0.668960 | -0.602385 |
| 4             | 6             | 0           | -0.290764 | 0.668960  | -0.602385 |
| 5             | 6             | 0           | 0.527242  | 1.756676  | -0.294601 |
| 6             | 6             | 0           | 1.984192  | 1.604915  | -0.204813 |
| 7             | 6             | 0           | -0.527242 | -1.756676 | -0.294601 |
| 8             | 6             | 0           | -1.741581 | 0.783909  | -0.821431 |
| 9             | 6             | 0           | -2.566898 | -0.347557 | -0.546040 |
| 10            | 6             | 0           | -1.984192 | -1.604915 | -0.204813 |
| 11            | 6             | 0           | -3.991212 | -0.230754 | -0.630005 |
| 12            | 6             | 0           | -4.557585 | 0.990234  | -1.073481 |
| 13            | 6             | 0           | -3.743613 | 2.040566  | -1.440115 |
| 14            | 6             | 0           | -2.345950 | 1.939894  | -1.315516 |
| 15            | 1             | 0           | -5.639349 | 1.073904  | -1.143235 |
| 16            | 1             | 0           | -4.175789 | 2.959005  | -1.828127 |
| 17            | 1             | 0           | -1.733748 | 2.776675  | -1.623376 |
| 18            | 6             | 0           | -4.799655 | -1.344304 | -0.281436 |
| 19            | 6             | 0           | -2.819440 | -2.669272 | 0.125900  |
| 20            | 6             | 0           | 2.819440  | 2.669272  | 0.125900  |
| 21            | 6             | 0           | 3.991212  | 0.230754  | -0.630005 |



|    |   |   |           |           |           |
|----|---|---|-----------|-----------|-----------|
| 22 | 6 | 0 | 2.345950  | -1.939894 | -1.315516 |
| 23 | 6 | 0 | 4.219345  | 2.532895  | 0.104620  |
| 24 | 1 | 0 | 4.840442  | 3.383264  | 0.372596  |
| 25 | 6 | 0 | 4.799655  | 1.344304  | -0.281436 |
| 26 | 1 | 0 | 5.880986  | 1.243592  | -0.330733 |
| 27 | 6 | 0 | 4.557585  | -0.990234 | -1.073481 |
| 28 | 6 | 0 | 3.743613  | -2.040566 | -1.440115 |
| 29 | 1 | 0 | 4.175789  | -2.959005 | -1.828127 |
| 30 | 1 | 0 | -5.880986 | -1.243592 | -0.330733 |
| 31 | 1 | 0 | 2.378423  | 3.624908  | 0.385592  |
| 32 | 1 | 0 | 5.639349  | -1.073904 | -1.143235 |
| 33 | 1 | 0 | 1.733748  | -2.776675 | -1.623376 |
| 34 | 1 | 0 | -2.378423 | -3.624908 | 0.385592  |
| 35 | 6 | 0 | 0.003028  | 3.038668  | 0.014313  |
| 36 | 6 | 0 | -0.003028 | -3.038668 | 0.014313  |
| 37 | 6 | 0 | 0.373357  | -4.150689 | 0.344112  |
| 38 | 6 | 0 | -0.373357 | 4.150689  | 0.344112  |
| 39 | 6 | 0 | -0.906561 | 5.419882  | 0.703067  |
| 40 | 6 | 0 | -2.297798 | 5.578141  | 0.879576  |
| 41 | 6 | 0 | -0.066673 | 6.537571  | 0.886653  |
| 42 | 6 | 0 | -2.825907 | 6.818300  | 1.225600  |
| 43 | 1 | 0 | -2.946767 | 4.718216  | 0.744733  |
| 44 | 6 | 0 | -0.604971 | 7.773370  | 1.232965  |
| 45 | 1 | 0 | 1.004704  | 6.423239  | 0.752241  |
| 46 | 6 | 0 | -1.984192 | 7.919609  | 1.403721  |
| 47 | 1 | 0 | -3.898932 | 6.926275  | 1.359633  |
| 48 | 1 | 0 | 0.053977  | 8.626385  | 1.370938  |
| 49 | 1 | 0 | -2.400352 | 8.885756  | 1.675520  |
| 50 | 6 | 0 | 0.906561  | -5.419882 | 0.703067  |
| 51 | 6 | 0 | 2.297798  | -5.578141 | 0.879576  |
| 52 | 6 | 0 | 0.066673  | -6.537571 | 0.886653  |
| 53 | 6 | 0 | 2.825907  | -6.818300 | 1.225600  |
| 54 | 1 | 0 | 2.946767  | -4.718216 | 0.744733  |
| 55 | 6 | 0 | 0.604971  | -7.773370 | 1.232965  |
| 56 | 1 | 0 | -1.004704 | -6.423239 | 0.752241  |
| 57 | 6 | 0 | 1.984192  | -7.919609 | 1.403721  |
| 58 | 1 | 0 | 3.898932  | -6.926275 | 1.359633  |
| 59 | 1 | 0 | -0.053977 | -8.626385 | 1.370938  |
| 60 | 1 | 0 | 2.400352  | -8.885756 | 1.675520  |
| 61 | 6 | 0 | -4.219345 | -2.532895 | 0.104620  |
| 62 | 1 | 0 | -4.840442 | -3.383264 | 0.372596  |

---

### 7,14-Bis{[4-(*N,N*-dimethylamino)phenyl]ethynyl}zethrene

$C_2$  symmetry

SCF Done: E (RB+HF-LYP) = -1805.38815785

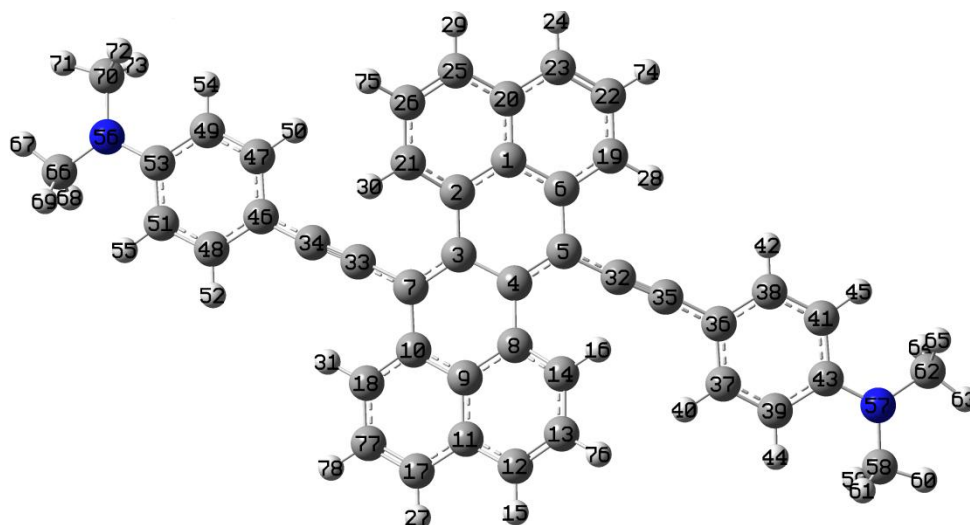

Standard orientation

| Center Number | Atomic Number | Atomic Type | X         | Y         | Z         |
|---------------|---------------|-------------|-----------|-----------|-----------|
| 1             | 6             | 0           | -2.570422 | 0.328093  | -0.858232 |
| 2             | 6             | 0           | -1.479808 | 1.208736  | -1.128851 |
| 3             | 6             | 0           | -0.107555 | 0.721207  | -0.912113 |
| 4             | 6             | 0           | 0.107555  | -0.721207 | -0.912113 |
| 5             | 6             | 0           | -0.964317 | -1.563281 | -0.608477 |
| 6             | 6             | 0           | -2.332656 | -1.038100 | -0.520004 |
| 7             | 6             | 0           | 0.964317  | 1.563281  | -0.608477 |
| 8             | 6             | 0           | 1.479808  | -1.208736 | -1.128851 |
| 9             | 6             | 0           | 2.570422  | -0.328093 | -0.858232 |
| 10            | 6             | 0           | 2.332656  | 1.038100  | -0.520004 |
| 11            | 6             | 0           | 3.916901  | -0.808650 | -0.942943 |
| 12            | 6             | 0           | 4.148658  | -2.135545 | -1.383157 |
| 13            | 6             | 0           | 3.090024  | -2.940963 | -1.744500 |
| 14            | 6             | 0           | 1.765716  | -2.483594 | -1.617965 |
| 15            | 1             | 0           | 5.172255  | -2.495648 | -1.453810 |
| 16            | 1             | 0           | 0.957663  | -3.136739 | -1.917824 |
| 17            | 6             | 0           | 4.985842  | 0.059656  | -0.598449 |
| 18            | 6             | 0           | 3.415005  | 1.851385  | -0.192220 |
| 19            | 6             | 0           | -3.415005 | -1.851385 | -0.192220 |
| 20            | 6             | 0           | -3.916901 | 0.808650  | -0.942943 |
| 21            | 6             | 0           | -1.765716 | 2.483594  | -1.617965 |
| 22            | 6             | 0           | -4.732243 | -1.358438 | -0.214774 |
| 23            | 6             | 0           | -4.985842 | -0.059656 | -0.598449 |
| 24            | 1             | 0           | -6.004612 | 0.316814  | -0.649139 |
| 25            | 6             | 0           | -4.148658 | 2.135545  | -1.383157 |
| 26            | 6             | 0           | -3.090024 | 2.940963  | -1.744500 |
| 27            | 1             | 0           | 6.004612  | -0.316814 | -0.649139 |
| 28            | 1             | 0           | -3.234743 | -2.888858 | 0.065477  |
| 29            | 1             | 0           | -5.172255 | 2.495648  | -1.453810 |

|    |   |   |           |           |           |
|----|---|---|-----------|-----------|-----------|
| 30 | 1 | 0 | -0.957663 | 3.136739  | -1.917824 |
| 31 | 1 | 0 | 3.234743  | 2.888858  | 0.065477  |
| 32 | 6 | 0 | -0.796132 | -2.938179 | -0.306545 |
| 33 | 6 | 0 | 0.796132  | 2.938179  | -0.306545 |
| 34 | 6 | 0 | 0.711743  | 4.111052  | 0.021169  |
| 35 | 6 | 0 | -0.711743 | -4.111052 | 0.021169  |
| 36 | 6 | 0 | -0.519874 | -5.468297 | 0.386833  |
| 37 | 6 | 0 | 0.778216  | -6.007592 | 0.508328  |
| 38 | 6 | 0 | -1.604686 | -6.330741 | 0.644456  |
| 39 | 6 | 0 | 0.982501  | -7.333085 | 0.858026  |
| 40 | 1 | 0 | 1.634066  | -5.363101 | 0.330208  |
| 41 | 6 | 0 | -1.409937 | -7.657701 | 0.994852  |
| 42 | 1 | 0 | -2.617180 | -5.945090 | 0.567463  |
| 43 | 6 | 0 | -0.107555 | -8.203793 | 1.102521  |
| 44 | 1 | 0 | 2.000542  | -7.693061 | 0.946276  |
| 45 | 1 | 0 | -2.279586 | -8.274334 | 1.187755  |
| 46 | 6 | 0 | 0.519874  | 5.468297  | 0.386833  |
| 47 | 6 | 0 | -0.778216 | 6.007592  | 0.508328  |
| 48 | 6 | 0 | 1.604686  | 6.330741  | 0.644456  |
| 49 | 6 | 0 | -0.982501 | 7.333085  | 0.858026  |
| 50 | 1 | 0 | -1.634066 | 5.363101  | 0.330208  |
| 51 | 6 | 0 | 1.409937  | 7.657701  | 0.994852  |
| 52 | 1 | 0 | 2.617180  | 5.945090  | 0.567463  |
| 53 | 6 | 0 | 0.107555  | 8.203793  | 1.102521  |
| 54 | 1 | 0 | -2.000542 | 7.693061  | 0.946276  |
| 55 | 1 | 0 | 2.279586  | 8.274334  | 1.187755  |
| 56 | 7 | 0 | -0.091364 | 9.534678  | 1.427879  |
| 57 | 7 | 0 | 0.091364  | -9.534678 | 1.427879  |
| 58 | 6 | 0 | 1.436921  | 10.022509 | 1.677986  |
| 59 | 1 | 0 | 1.919667  | -9.518680 | 2.530023  |
| 60 | 1 | 0 | 1.395069  | 11.091700 | 1.893620  |
| 61 | 1 | 0 | 2.077007  | -9.886290 | 0.797436  |
| 62 | 6 | 0 | -1.038102 | 10.354663 | 1.831210  |
| 63 | 1 | 0 | -0.691047 | 11.371417 | 2.023930  |
| 64 | 1 | 0 | -1.529460 | -9.980410 | 2.742934  |
| 65 | 1 | 0 | -1.792898 | 10.406982 | 1.036746  |
| 66 | 6 | 0 | 1.038102  | 10.354663 | 1.831210  |
| 67 | 1 | 0 | 0.691047  | 11.371417 | 2.023930  |
| 68 | 1 | 0 | 1.529460  | 9.980410  | 2.742934  |
| 69 | 1 | 0 | 1.792898  | 10.406982 | 1.036746  |
| 70 | 6 | 0 | -1.436921 | 10.022509 | 1.677986  |
| 71 | 1 | 0 | -1.395069 | 11.091700 | 1.893620  |
| 72 | 1 | 0 | -2.077007 | 9.886290  | 0.797436  |
| 73 | 1 | 0 | -1.919667 | 9.518680  | 2.530023  |
| 74 | 1 | 0 | -5.552354 | -2.020530 | 0.050232  |
| 75 | 1 | 0 | -3.269704 | 3.941464  | 2.129368  |
| 76 | 1 | 0 | 3.269704  | -3.941464 | 2.129368  |
| 77 | 6 | 0 | 4.732243  | 1.358438  | 0.214774  |
| 78 | 1 | 0 | 5.552354  | 2.020530  | 0.050232  |

---

### 7,14-Bis[(dinitrophenyl)ethynyl]zethrene

C<sub>2</sub> symmetry

SCF Done: E (RB+HF-LYP) = -1946.45373662

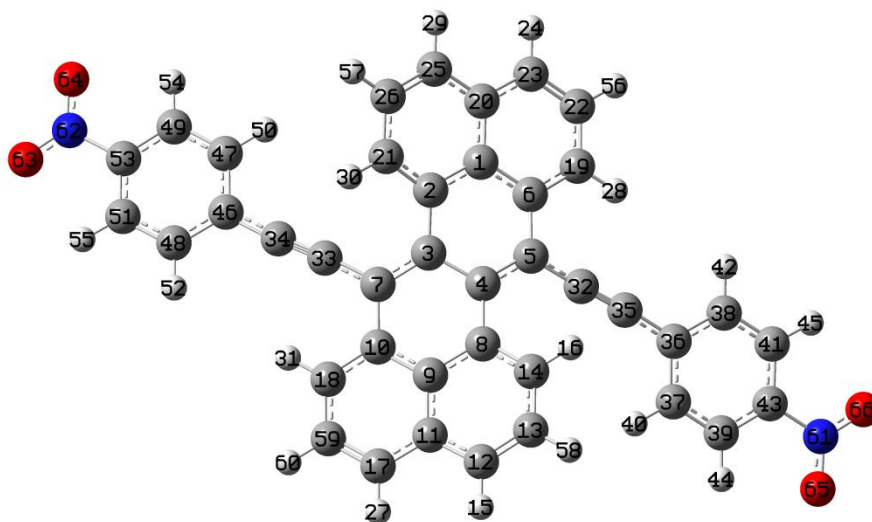

Standard orientation

| Center Number | Atomic Number | Atomic Type | X         | Y         | Z         |
|---------------|---------------|-------------|-----------|-----------|-----------|
| 1             | 6             | 0           | 0.347124  | 2.566222  | -0.869459 |
| 2             | 6             | 0           | 1.217285  | 1.468562  | -1.141619 |
| 3             | 6             | 0           | 0.721054  | 0.103077  | -0.917096 |
| 4             | 6             | 0           | -0.721053 | -0.103069 | -0.917096 |
| 5             | 6             | 0           | -1.550075 | 0.976688  | -0.603100 |
| 6             | 6             | 0           | -1.018562 | 2.341544  | -0.523113 |
| 7             | 6             | 0           | 1.550075  | -0.976682 | -0.603101 |
| 8             | 6             | 0           | -1.217285 | -1.468552 | -1.141624 |
| 9             | 6             | 0           | -0.347125 | -2.566214 | -0.869468 |
| 10            | 6             | 0           | 1.018561  | -2.341539 | -0.523120 |
| 11            | 6             | 0           | -0.839202 | -3.906808 | -0.961113 |
| 12            | 6             | 0           | -2.166327 | -4.124228 | -1.408141 |
| 13            | 6             | 0           | -2.961470 | -3.058298 | -1.772654 |
| 14            | 6             | 0           | -2.491308 | -1.739065 | -1.641835 |
| 15            | 1             | 0           | -2.535489 | -5.143810 | -1.484622 |
| 16            | 1             | 0           | -3.130630 | -0.923641 | -1.953122 |
| 17            | 6             | 0           | 0.017775  | -4.984664 | -0.616830 |
| 18            | 6             | 0           | 1.821603  | -3.431904 | -0.197167 |
| 19            | 6             | 0           | -1.821605 | 3.431908  | -0.197156 |
| 20            | 6             | 0           | 0.839200  | 3.906817  | -0.961098 |
| 21            | 6             | 0           | 2.491307  | 1.739079  | -1.641830 |
| 22            | 6             | 0           | -1.317655 | 4.744728  | -0.227120 |
| 23            | 6             | 0           | -0.017778 | 4.984671  | -0.616810 |
| 24            | 1             | 0           | 0.367108  | 5.999660  | -0.671903 |
| 25            | 6             | 0           | 2.166325  | 4.124240  | -1.408123 |
| 26            | 6             | 0           | 2.961469  | 3.058313  | -1.772641 |

|    |   |   |            |           |           |
|----|---|---|------------|-----------|-----------|
| 27 | 1 | 0 | -0.367112  | -5.999652 | -0.671927 |
| 28 | 1 | 0 | -2.859976  | 3.264062  | 0.065496  |
| 29 | 1 | 0 | 2.535487   | 5.143823  | -1.484600 |
| 30 | 1 | 0 | 3.130629   | 0.923658  | -1.953122 |
| 31 | 1 | 0 | 2.859974   | -3.264060 | 0.065487  |
| 32 | 6 | 0 | -2.916611  | 0.801472  | -0.271809 |
| 33 | 6 | 0 | 2.916613   | -0.801471 | -0.271813 |
| 34 | 6 | 0 | 4.081086   | -0.718330 | 0.082580  |
| 35 | 6 | 0 | -4.081085  | 0.718328  | 0.082581  |
| 36 | 6 | 0 | -5.432359  | 0.521049  | 0.465285  |
| 37 | 6 | 0 | -5.934606  | -0.790115 | 0.632822  |
| 38 | 6 | 0 | -6.296945  | 1.617226  | 0.681790  |
| 39 | 6 | 0 | -7.256257  | -0.998713 | 0.999204  |
| 40 | 1 | 0 | -5.271699  | -1.634090 | 0.473193  |
| 41 | 6 | 0 | -7.619141  | 1.413276  | 1.049379  |
| 42 | 1 | 0 | -5.918458  | 2.626203  | 0.555711  |
| 43 | 6 | 0 | -8.084008  | 0.106378  | 1.203150  |
| 44 | 1 | 0 | -7.657484  | -1.995841 | 1.131994  |
| 45 | 1 | 0 | -8.295268  | 2.242127  | 1.218763  |
| 46 | 6 | 0 | 5.432358   | -0.521054 | 0.465289  |
| 47 | 6 | 0 | 5.934617   | 0.790109  | 0.632796  |
| 48 | 6 | 0 | 6.296936   | -1.617233 | 0.681814  |
| 49 | 6 | 0 | 7.256269   | 0.998705  | 0.999177  |
| 50 | 1 | 0 | 5.271718   | 1.634086  | 0.473143  |
| 51 | 6 | 0 | 7.619133   | -1.413287 | 1.049404  |
| 52 | 1 | 0 | 5.918443   | -2.626210 | 0.555752  |
| 53 | 6 | 0 | 8.084010   | -0.106389 | 1.203150  |
| 54 | 1 | 0 | 7.657503   | 1.995832  | 1.131946  |
| 55 | 1 | 0 | 8.295253   | -2.242139 | 1.218806  |
| 56 | 1 | 0 | -1.971011  | 5.571426  | 0.037019  |
| 57 | 1 | 0 | 3.959609   | 3.229350  | -2.166188 |
| 58 | 1 | 0 | -3.959610  | -3.229332 | -2.166202 |
| 59 | 6 | 0 | 1.317652   | -4.744724 | -0.227137 |
| 60 | 1 | 0 | 1.971007   | -5.571423 | 0.036999  |
| 61 | 7 | 0 | -9.481536  | -0.111983 | 1.591154  |
| 62 | 7 | 0 | 9.481538   | 0.111969  | 1.591152  |
| 63 | 8 | 0 | 10.188724  | -0.881161 | 1.768286  |
| 64 | 8 | 0 | 9.866018   | 1.275765  | 1.716282  |
| 65 | 8 | 0 | -9.866006  | -1.275779 | 1.716309  |
| 66 | 8 | 0 | -10.188730 | 0.881145  | 1.768265  |

---

7-[[4-(*N,N*-dimethylamino)phenyl]ethynyl]-14-[(nitrophenyl)ethynyl]zethrene

SCF Done: E (RB+HF-LYP) = -1875.92226890

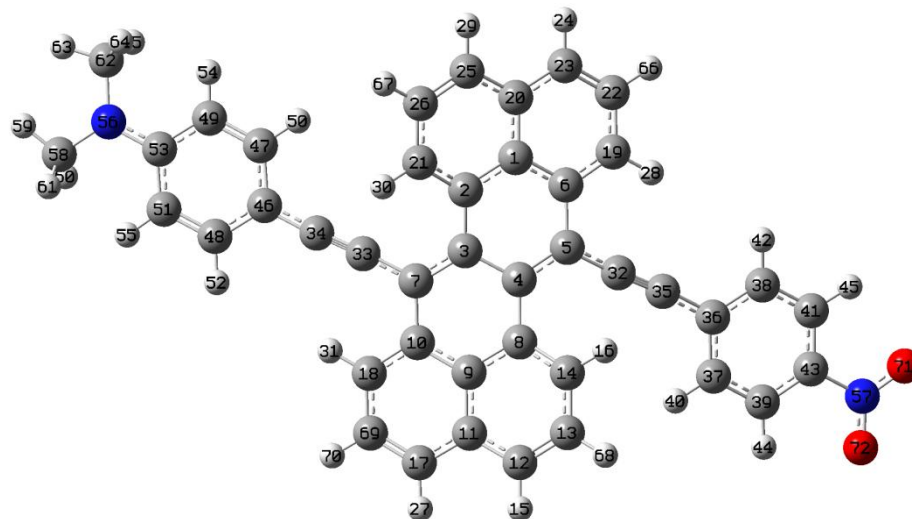

Standard orientation

| Center Number | Atomic Number | Atomic Type | X         | Y         | Z         |
|---------------|---------------|-------------|-----------|-----------|-----------|
| 1             | 6             | 0           | 0.236511  | 2.601899  | -0.832195 |
| 2             | 6             | 0           | 1.120035  | 1.514313  | -1.108150 |
| 3             | 6             | 0           | 0.635649  | 0.139069  | -0.904565 |
| 4             | 6             | 0           | -0.804165 | -0.077230 | -0.901857 |
| 5             | 6             | 0           | -1.646465 | 0.991778  | -0.583624 |
| 6             | 6             | 0           | -1.129191 | 2.361927  | -0.492833 |
| 7             | 6             | 0           | 1.475319  | -0.938174 | -0.606558 |
| 8             | 6             | 0           | -1.294310 | -1.443259 | -1.138050 |
| 9             | 6             | 0           | -0.418266 | -2.537962 | -0.875495 |
| 10            | 6             | 0           | 0.946870  | -2.306113 | -0.532640 |
| 11            | 6             | 0           | -0.903131 | -3.880709 | -0.975887 |
| 12            | 6             | 0           | -2.229268 | -4.102491 | -1.423919 |
| 13            | 6             | 0           | -3.029421 | -3.038334 | -1.782100 |
| 14            | 6             | 0           | -2.565999 | -1.717409 | -1.641959 |
| 15            | 1             | 0           | -2.592987 | -5.123660 | -1.506947 |
| 16            | 1             | 0           | -3.209291 | -0.903530 | -1.948812 |
| 17            | 6             | 0           | -0.039690 | -4.955886 | -0.640010 |
| 18            | 6             | 0           | 1.756410  | -3.394644 | -0.216202 |
| 19            | 6             | 0           | -1.944651 | 3.440846  | -0.160317 |
| 20            | 6             | 0           | 0.714535  | 3.949494  | -0.910240 |
| 21            | 6             | 0           | 2.395923  | 1.804870  | -1.591325 |
| 22            | 6             | 0           | -1.454396 | 4.759036  | -0.179475 |
| 23            | 6             | 0           | -0.155956 | 5.015463  | -0.562190 |
| 24            | 1             | 0           | 0.218640  | 6.034910  | -0.608868 |
| 25            | 6             | 0           | 2.041851  | 4.185820  | -1.346920 |
| 26            | 6             | 0           | 2.850707  | 3.130704  | -1.710392 |
| 27            | 1             | 0           | -0.419017 | -5.972807 | -0.700821 |

|    |   |   |            |           |           |
|----|---|---|------------|-----------|-----------|
| 28 | 1 | 0 | -2.981747  | 3.259938  | 0.098713  |
| 29 | 1 | 0 | 2.399791   | 5.210331  | -1.412387 |
| 30 | 1 | 0 | 3.051706   | 0.999579  | -1.893032 |
| 31 | 1 | 0 | 2.794431   | -3.220464 | 0.043297  |
| 32 | 6 | 0 | -3.010844  | 0.800869  | -0.256264 |
| 33 | 6 | 0 | 2.846883   | -0.773125 | -0.296194 |
| 34 | 6 | 0 | 4.020341   | -0.702294 | 0.034264  |
| 35 | 6 | 0 | -4.175911  | 0.706850  | 0.095866  |
| 36 | 6 | 0 | -5.524931  | 0.495674  | 0.473609  |
| 37 | 6 | 0 | -6.020649  | -0.821027 | 0.623651  |
| 38 | 6 | 0 | -6.398675  | 1.582841  | 0.703883  |
| 39 | 6 | 0 | -7.340953  | -1.042842 | 0.985237  |
| 40 | 1 | 0 | -5.352096  | -1.658572 | 0.453776  |
| 41 | 6 | 0 | -7.719422  | 1.365595  | 1.067126  |
| 42 | 1 | 0 | -6.026521  | 2.595828  | 0.591554  |
| 43 | 6 | 0 | -8.177497  | 0.053688  | 1.203363  |
| 44 | 1 | 0 | -7.735522  | -2.044398 | 1.104072  |
| 45 | 1 | 0 | -8.400795  | 2.188048  | 1.246498  |
| 46 | 6 | 0 | 5.381102   | -0.526793 | 0.389769  |
| 47 | 6 | 0 | 5.941082   | 0.764886  | 0.490025  |
| 48 | 6 | 0 | 6.227082   | -1.622680 | 0.657788  |
| 49 | 6 | 0 | 7.270789   | 0.952856  | 0.829321  |
| 50 | 1 | 0 | 5.309175   | 1.628095  | 0.302844  |
| 51 | 6 | 0 | 7.558212   | -1.444800 | 0.997596  |
| 52 | 1 | 0 | 5.824853   | -2.629681 | 0.595852  |
| 53 | 6 | 0 | 8.124801   | -0.148712 | 1.086590  |
| 54 | 1 | 0 | 7.649041   | 1.965565  | 0.899844  |
| 55 | 1 | 0 | 8.163308   | -2.320924 | 1.197023  |
| 56 | 7 | 0 | 9.455090   | 0.033101  | 1.408610  |
| 57 | 7 | 0 | -9.571675  | -0.178412 | 1.586221  |
| 58 | 6 | 0 | 10.276042  | -1.108448 | 1.775672  |
| 59 | 1 | 0 | 11.293124  | -0.768131 | 1.976504  |
| 60 | 1 | 0 | 9.902448   | -1.620178 | 2.675288  |
| 61 | 1 | 0 | 10.324491  | -1.843777 | 0.962162  |
| 62 | 6 | 0 | 9.982771   | 1.375610  | 1.585363  |
| 63 | 1 | 0 | 11.048171  | 1.314172  | 1.812969  |
| 64 | 1 | 0 | 9.870136   | 1.971998  | 0.670781  |
| 65 | 1 | 0 | 9.487976   | 1.915697  | 2.406599  |
| 66 | 1 | 0 | -2.117618  | 5.577030  | 0.088274  |
| 67 | 1 | 0 | 3.851749   | 3.314394  | -2.091540 |
| 68 | 1 | 0 | -4.026545  | -3.211598 | -2.177587 |
| 69 | 6 | 0 | 1.259622   | -4.710080 | -0.251929 |
| 70 | 1 | 0 | 1.918695   | -5.534564 | 0.005677  |
| 71 | 8 | 0 | -10.287183 | 0.807423  | 1.776264  |
| 72 | 8 | 0 | -9.950564  | -1.346495 | 1.695914  |

---

## 8. References

- 1 Programs for Crystal Structure Analysis (Release 97-2). G. M. Sheldrick, Institut für Anorganische Chemie der Universität, Tammanstrasse 4, D-3400 Göttingen, Germany, 1998.
- 2 Gaussian 09, Revision A02, M. J. Frisch, G. W. Trucks, H. B. Schlegel, G. E. Scuseria, M. A. Robb, J. R. Cheeseman, G. Scalmani, V. Barone, B. Mennucci, G. A. Petersson, H. Nakatsuji, M. Caricato, X. Li, H. P. Hratchian, A. F. Izmaylov, J. Bloino, G. Zheng, J. L. Sonnenberg, M. Hada, M. Ehara, K. Toyota, R. Fukuda, J. Hasegawa, M. Ishida, T. Nakajima, Y. Honda, O. Kitao, H. Nakai, T. Vreven, J. A. Montgomery, Jr., J. E. Peralta, F. Ogliaro, M. Bearpark, J. J. Heyd, E. Brothers, K. N. Kudin, V. N. Staroverov, R. Kobayashi, J. Normand, K. Raghavachari, A. Rendell, J. C. Burant, S. S. Iyengar, J. Tomasi, M. Cossi, N. Rega, J. M. Millam, M. Klene, J. E. Knox, J. B. Cross, V. Bakken, C. Adamo, J. Jaramillo, R. Gomperts, R. E. Stratmann, O. Yazyev, A. J. Austin, R. Cammi, C. Pomelli, J. W. Ochterski, R. L. Martin, K. Morokuma, V. G. Zakrzewski, G. A. Voth, P. Salvador, J. J. Dannenberg, S. Dapprich, A. D. Daniels, Ö. Farkas, J. B. Foresman, J. V. Ortiz, J. Cioslowski, and D. J. Fox, Gaussian, Inc., Wallingford CT, 2009.
- 3 H. Quast, W. Nüdling, G. Klemm, A. Kirschfeld, P. Neuhaus, W. Sander, D. A. Hrowat and W. T. Borden, *J. Org. Chem.* **2008**, *73*, 4956.
- 4 N. Niamnont, W. Siripornnoppakhun, P. Rashataskhon and M. Sukwattanasinitt, *Org. Lett.* **2009**, *11*, 2768.
- 5 L. B. Beaulieu, L. B. Delvos and A. B. Charette, *Org. Lett.* **2010**, *12*, 1348.
- 6 F. L. Arbeloa, P. R. Ojeda and I. L. Arbeloa, *J. Lumin.* **1989**, *44*, 105.
